# Supplementary material for: An expeditious asymmetric synthesis of the pentacyclic core of the cortistatins by an intramolecular (4+3) cycloaddition
Source: Royal Society of Chemistry journal article supplement (doi:10.1039/c1cc00087j), 2011-01-01

## Electronic Supplementary Information (Part 2)

### An Expeditious Asymmetric Synthesis of the Pentacyclic Core of the Cortistatins by an Intramolecular (4+3) Cycloaddition

Lok Lok Liu, Pauline Chiu\*

*Department of Chemistry, The University of Hong Kong, Pokfulam Road, Hong Kong, P. R. China*  
*pchiu@hku.hk*

#### Contents

|                                                                          |        |
|--------------------------------------------------------------------------|--------|
| <sup>1</sup> H and <sup>13</sup> C NMR spectra of all new compounds..... | S16-45 |
|--------------------------------------------------------------------------|--------|

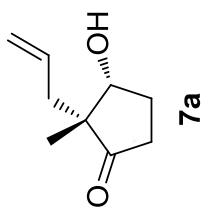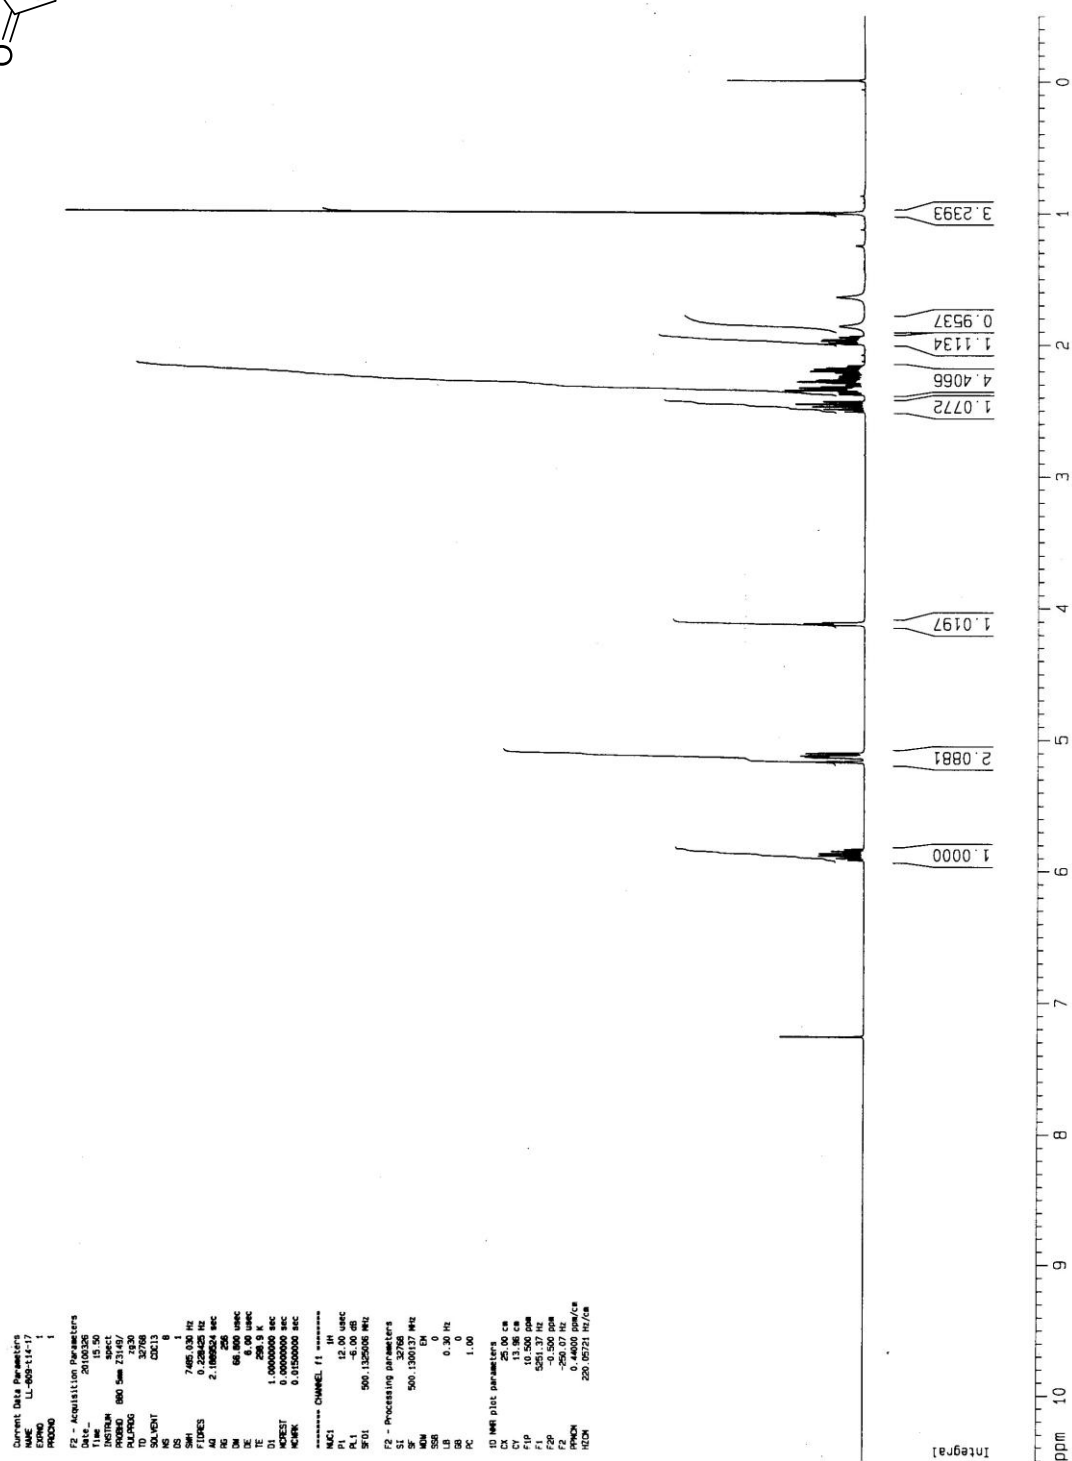

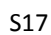

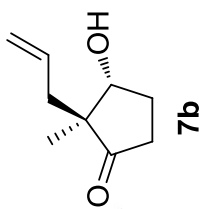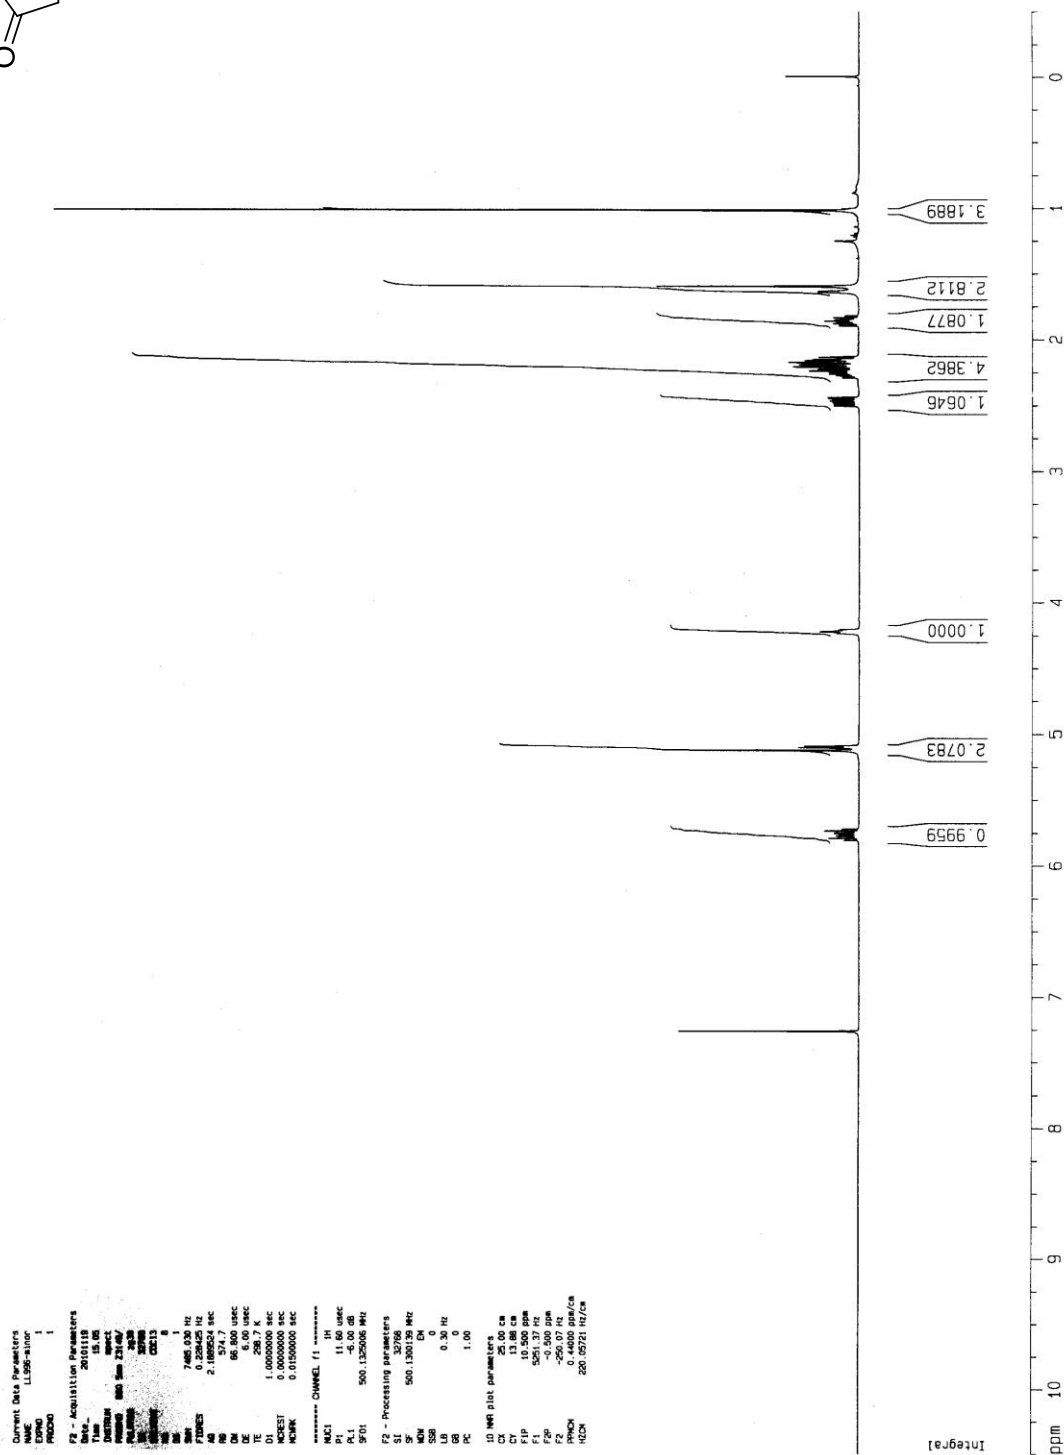

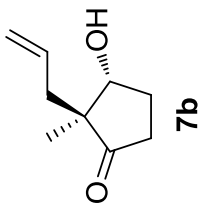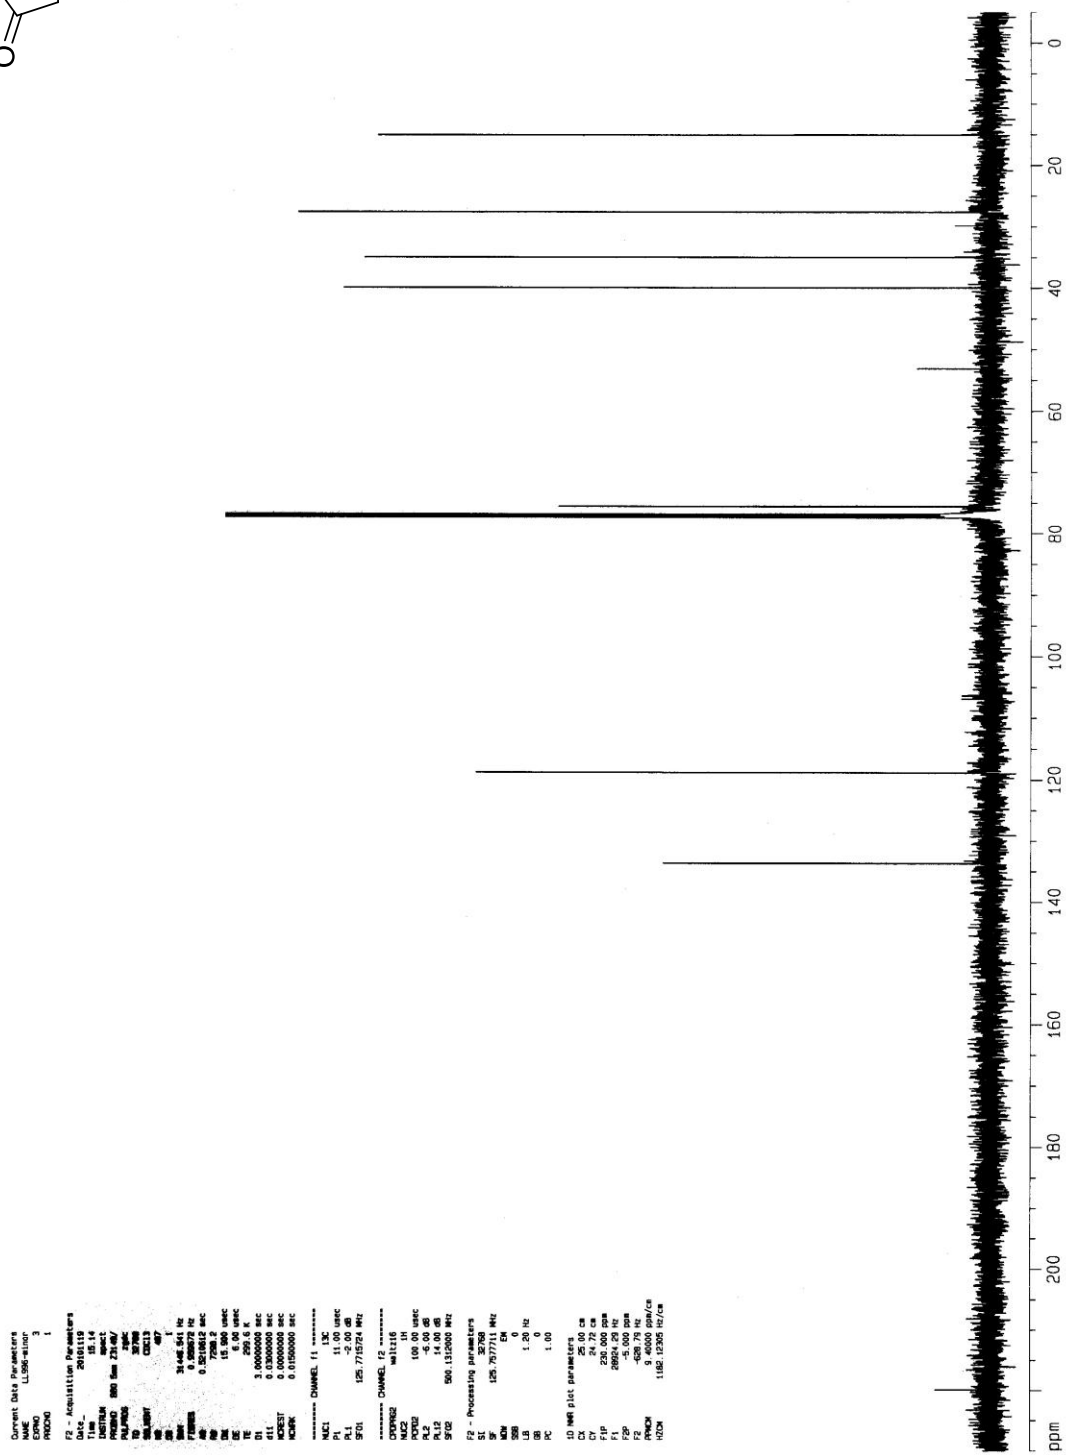

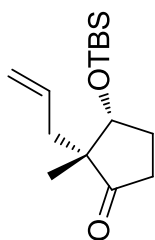

**TBS-7a**

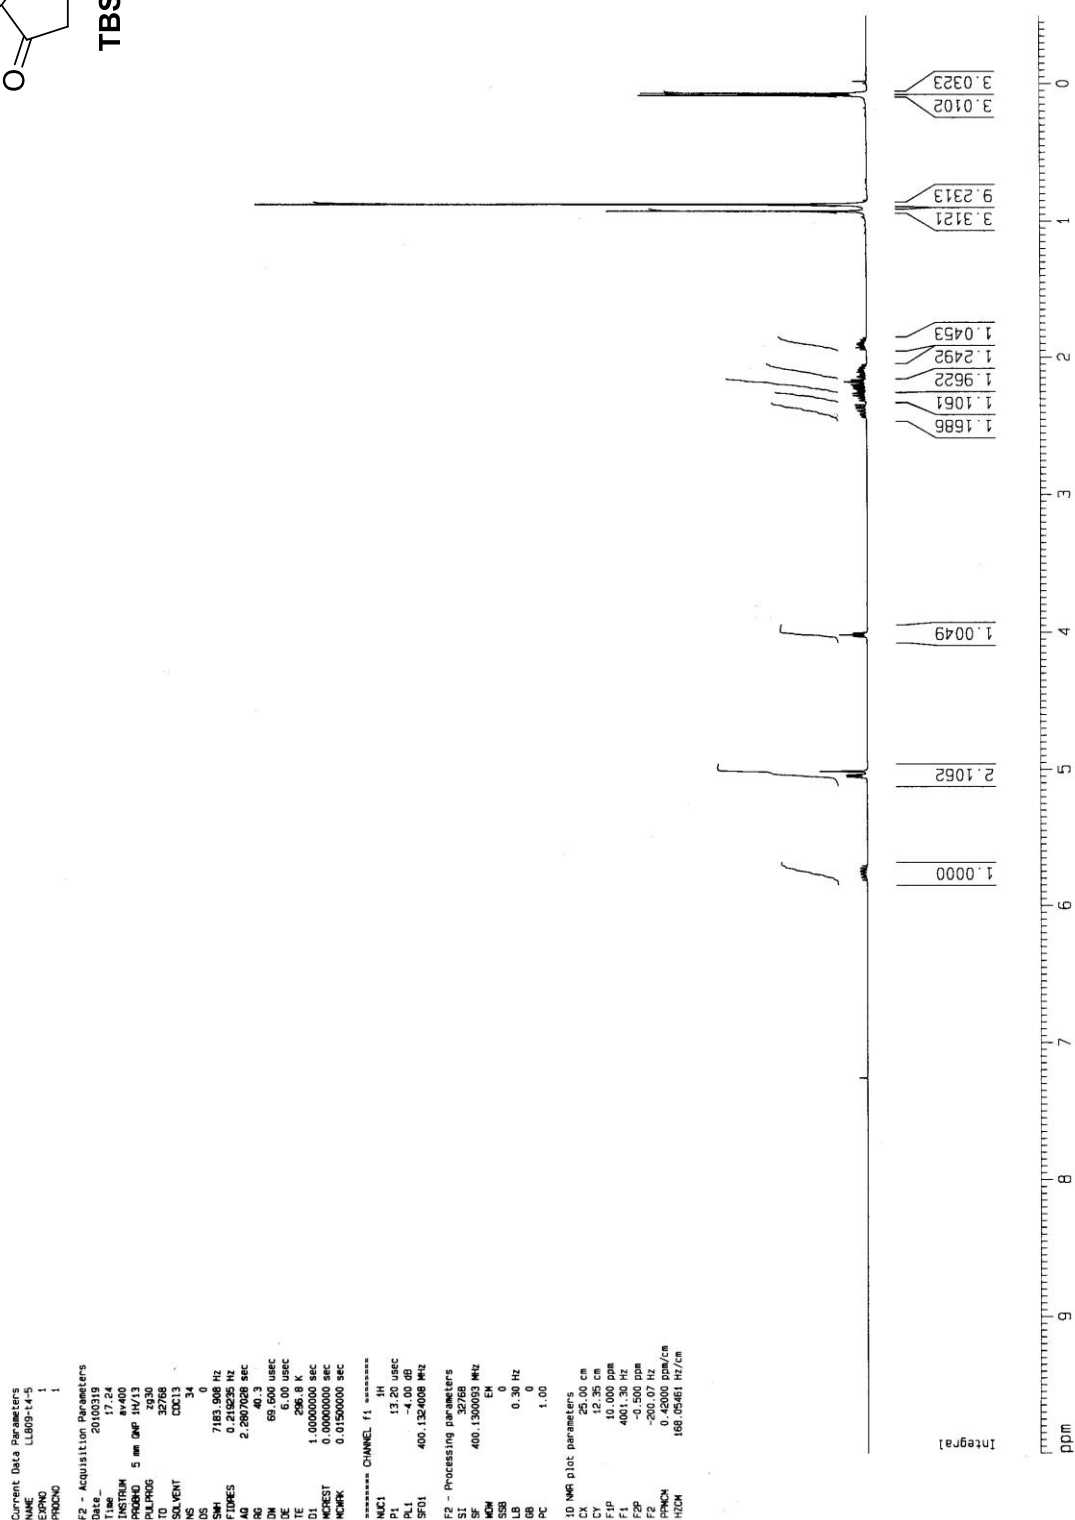

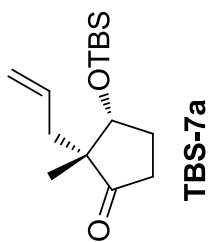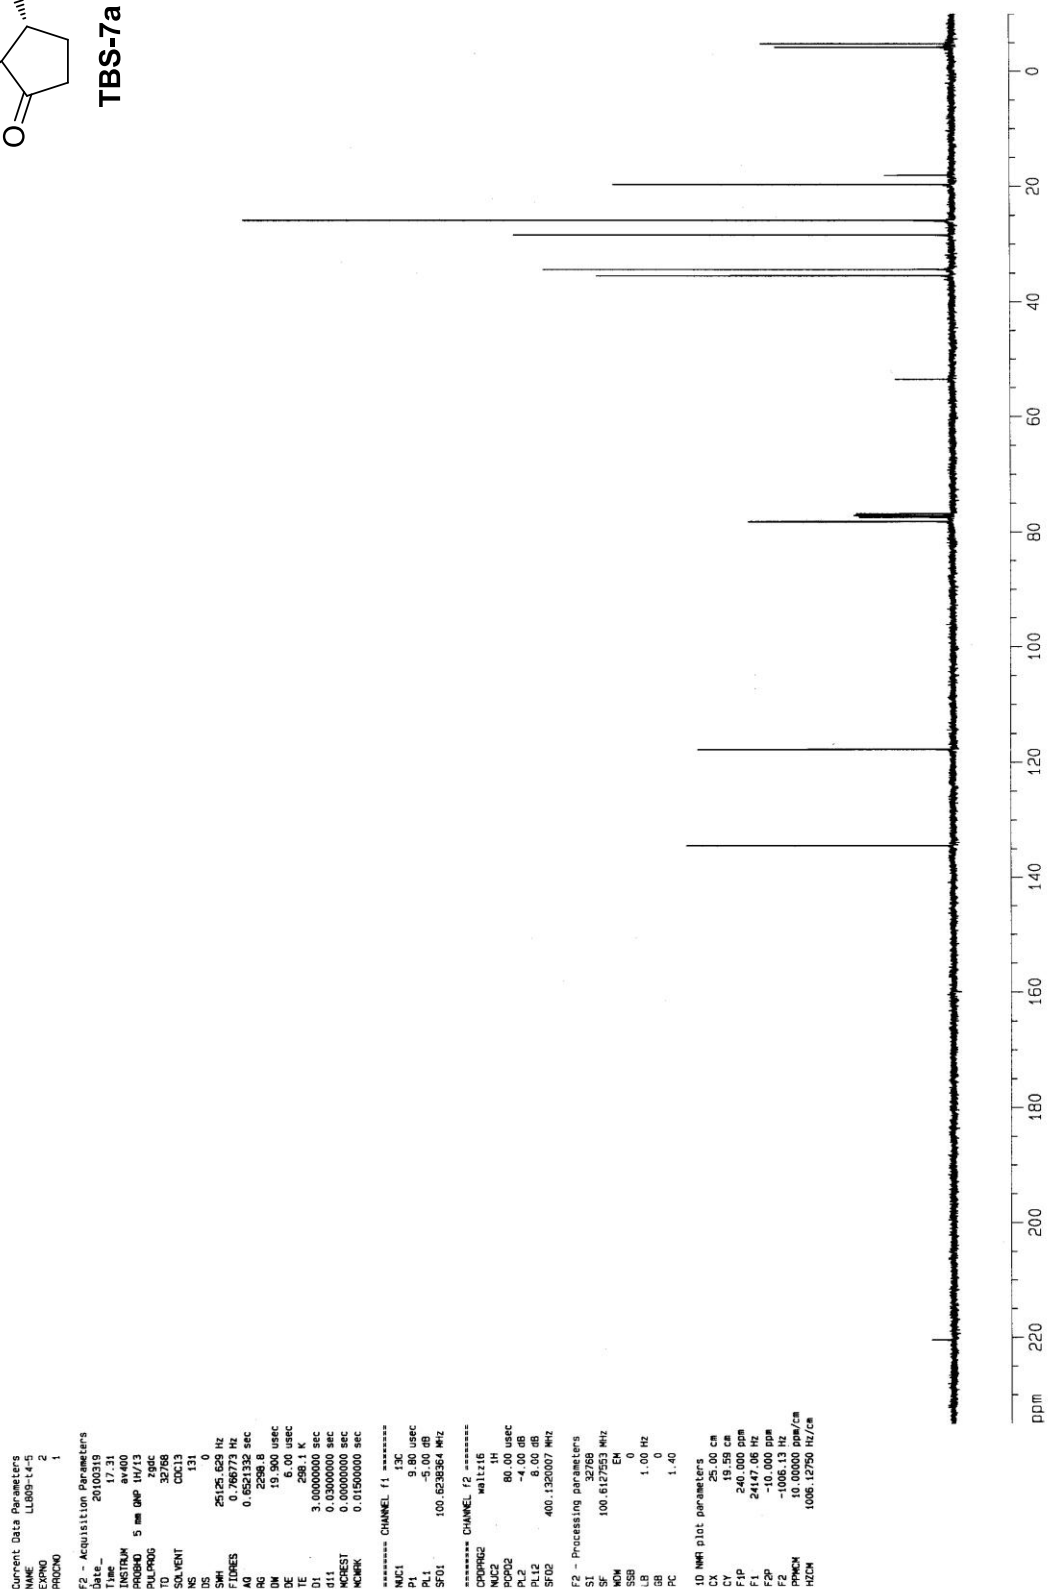

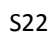



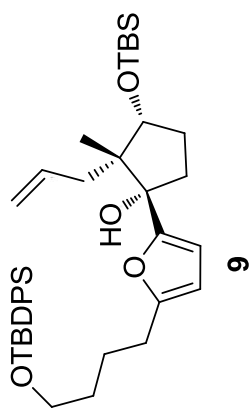

Current Data Parameters  
NAME LL1013  
EXPNO 2  
PROCNO 1

F2 - Acquisition Parameters  
Date\_ 20101108  
Time 15.02  
INSTRUM spect  
PROBHD 5 mm QNP 1H/13  
PULPROG zgpg30  
TD 32768  
FIDRES 0.32768  
SOLVENT CDCl<sub>3</sub>  
NS 136  
DS 0  
SWH 25125.629 Hz  
FIDRES 0.32768 Hz  
AQ 0.0521132 sec  
RG 2298.8  
DM 19.900 usec  
DE 6.00 usec  
TE 297.3 K  
D1 3.00000000 sec  
d11 0.03000000 sec  
DELTA 0.05000000 sec  
NUC1 13C  
NUC2 1H  
===== CHANNEL f1 =====  
NUC1 13C  
P1 10.00 usec  
PL1 -5.00 dB  
SFO1 100.625000 MHz  
===== CHANNEL f2 =====  
CPDPRG2 zgpg30  
NUC2 1H  
PCPD2 80.00 usec  
PL2 -4.00 dB  
SFO2 400.132007 MHz  
F2 - Processing parameters  
SI 32768  
SF 100.6127431 MHz  
WDW EN  
SSB 0  
LB 1.00 Hz  
GB 0  
PC 1.40

1D NMR plot parameters  
CX 25.00 cm  
CY 11.93 cm  
CZ 18.00 cm  
F1 1810.20 Hz  
F2 -10.000 ppm  
F2 -1006.13 Hz  
PPM0 7.60000 ppm/cm  
HZ0 784.65690 Hz/cm

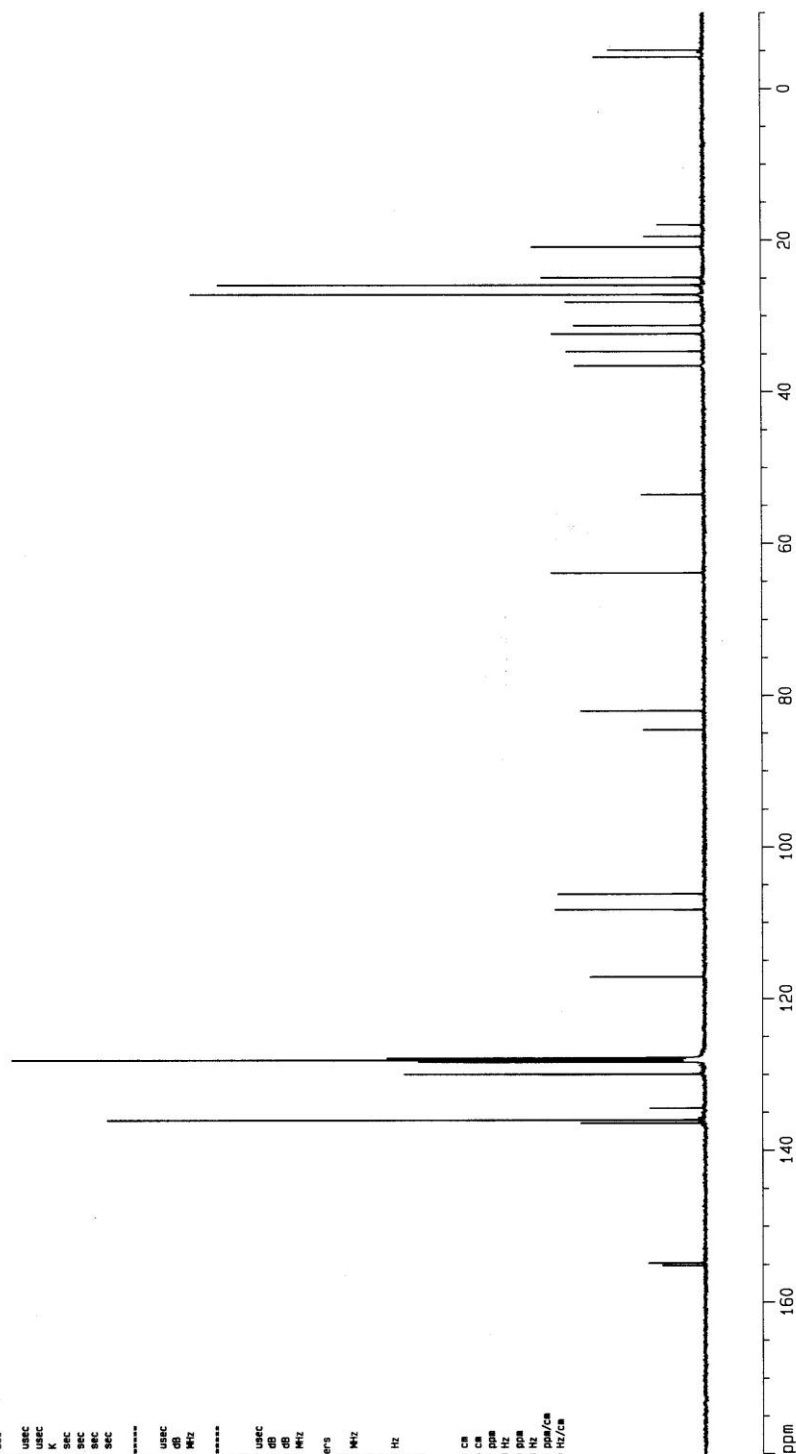

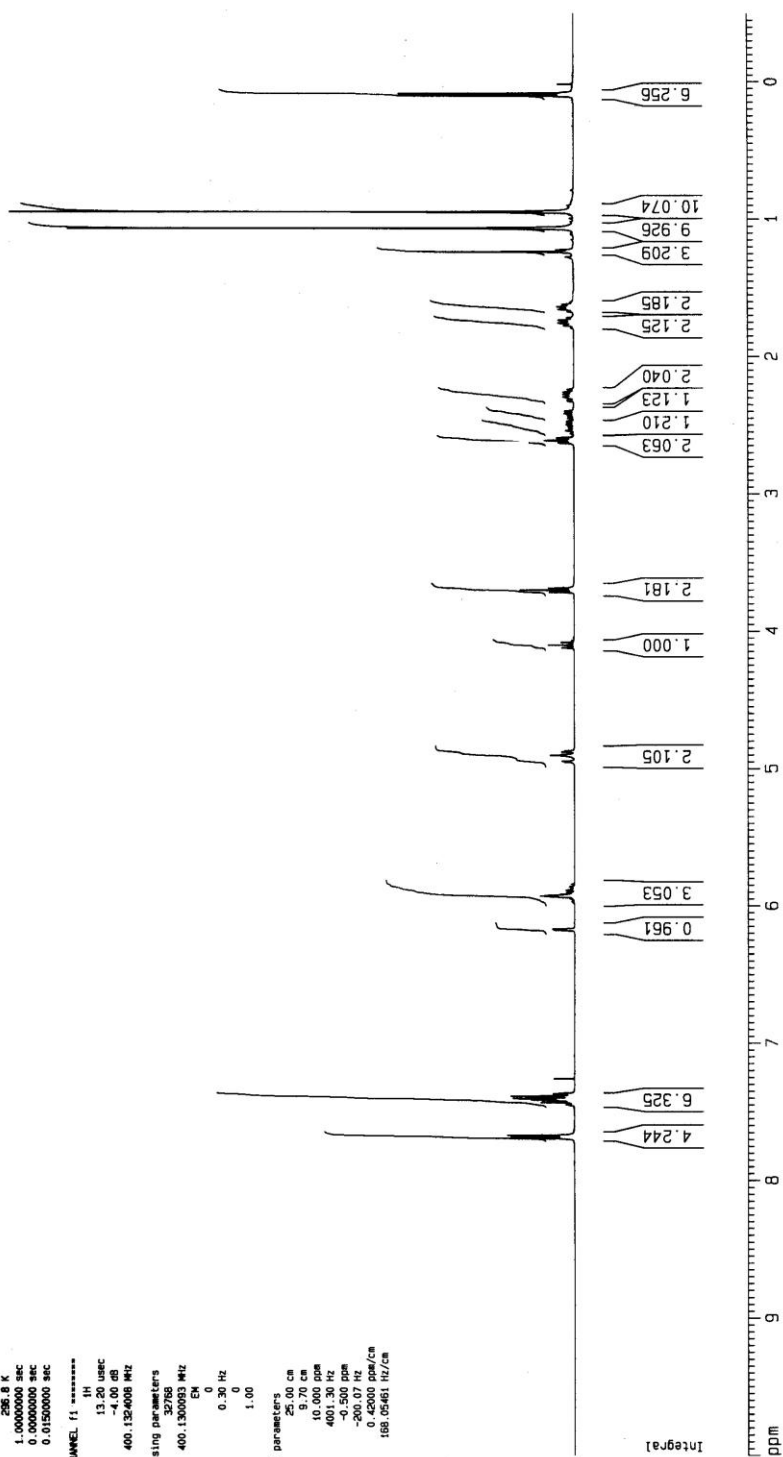

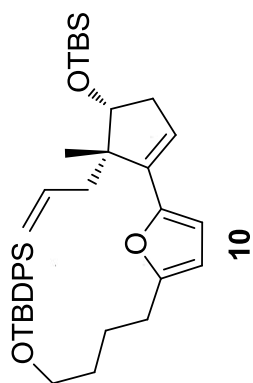

Current Data Parameters  
NAME LL1014  
EXPNO 2  
PROCNO 1

F2 - Acquisition Parameters  
Date\_ 20101109  
Time 19.14  
INSTRUM av400  
PROBHD 5 mm QNP  
PULPROG zgpg30  
TD 32768  
SOLVENT CDCl3  
NS 80  
DS 0  
SWH 20126.859 Hz  
FIDRES 0.000775 Hz  
AQ 0.001512 sec  
RG 2098.8  
DM 19.900 usec  
DE 6.00 usec  
TE 297.1 K  
D1 3.00000000 sec  
d11 0.00000000 sec  
DELTA 0.00000000 sec  
NUC1 13C  
NUC2 1H

===== CHANNEL f1 =====  
NUC1 13C  
P1 10.00 usec  
PL1 -5.00 dB  
SFO1 100.6253504 MHz

===== CHANNEL f2 =====  
CPDPRG2 waltz16  
NUC2 1H  
P2 80.00 usec  
PL2 -4.00 dB  
SFO2 400.132007 MHz

F2 - Processing parameters  
SI 32768  
SF 100.6127561 MHz  
WDW EN  
SSB 0  
LB 1.00 Hz  
GB 0  
PC 1.40

10 NMR plot parameters  
CX 25.00 cm  
CY 11.33 cm  
FID 180  
F1 1810.20 Hz  
F2 -10.000 ppm  
F3 -1006.13 Hz  
PPMCH 7.50000 ppm/cm  
HZCH 764.95692 Hz/cm

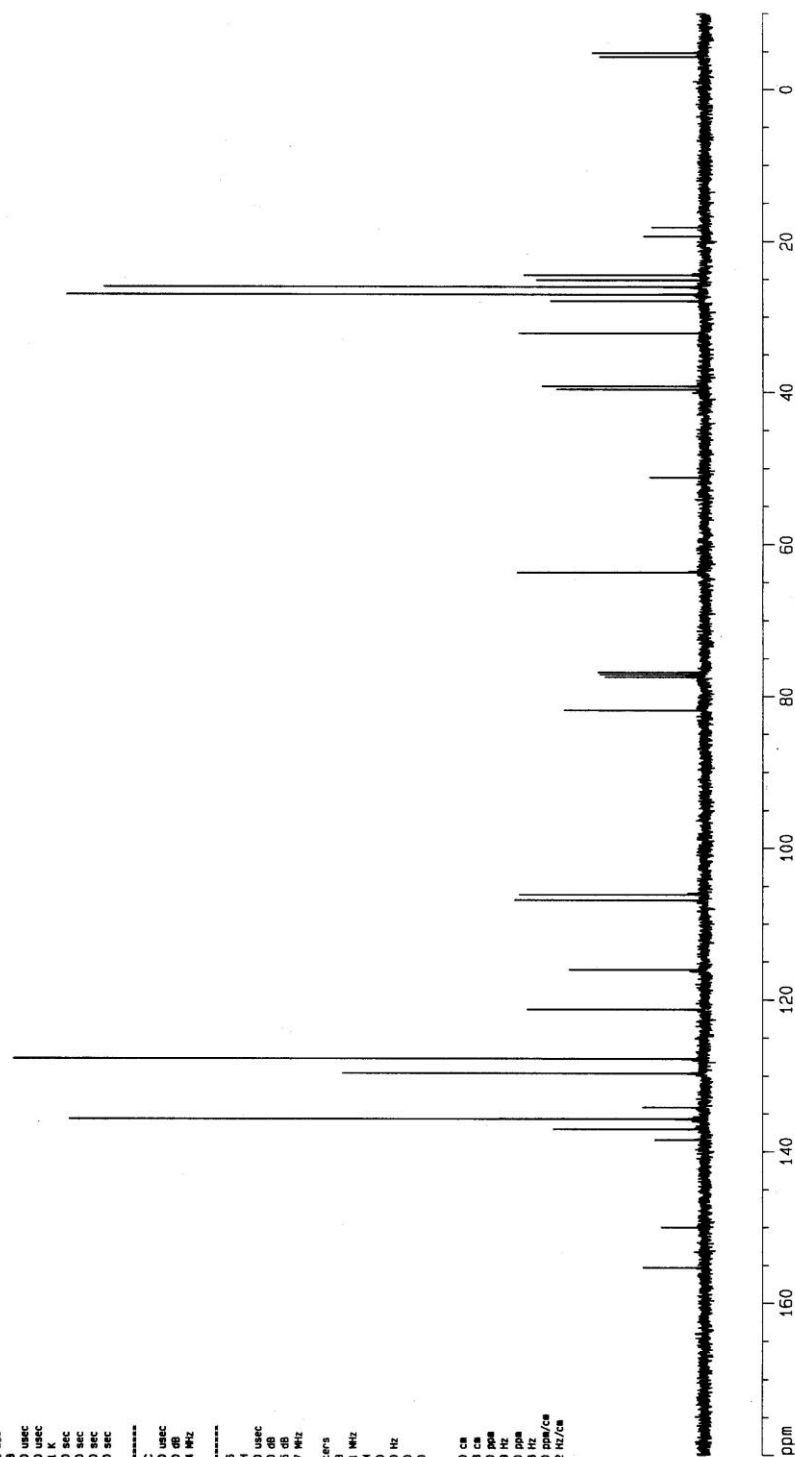

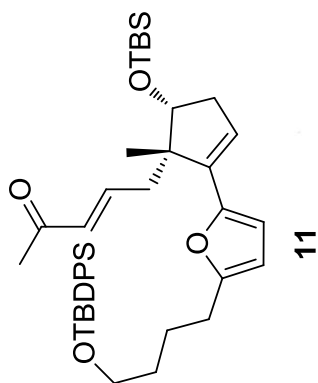

Current Data Parameters  
NAME: 11-17  
EXPNO: 1  
PROCNO: 1

F2 - Acquisition Parameters  
Date\_: 20100405  
Time: 17:05  
INSTRUM: spect  
PROBHD: 5 mm QNP 1H/13  
PULPROG: zgpg30  
TD: 32768  
SOLVENT: CDCl3  
NS: 15  
DS: 4  
SWH: 7163.908 Hz  
FIDRES: 0.218295 Hz  
AQ: 2.2867028 sec  
RG: 90.5  
DM: 69.600 usec  
DE: 6.00 usec  
TE: 300.2 K  
D1: 1.0000000 sec  
d11: 0.0000000 sec  
d12: 0.0000000 sec  
d13: 0.0150000 sec  
MCPRK: 0.0150000 sec

===== CHANNEL f1 =====  
NUC1: 1H  
P1: 13.20 usec  
PL1: -2.00 dB  
SFO1: 400.1324008 MHz

F2 - Processing parameters  
SI: 32768  
SF: 400.1350093 MHz  
WDW: EM  
SSB: 0  
LB: 0.30 Hz  
GB: 0  
PC: 1.00

1D NMR plot parameters  
RG: 256.00 cm  
CY: 9.40 cm  
FIP: 10.000 ppm  
F1: 4001.30 Hz  
F2: -0.500 ppm  
F2: -200.07 Hz  
NUC2: 13C  
NUC2: 100.6260000 MHz

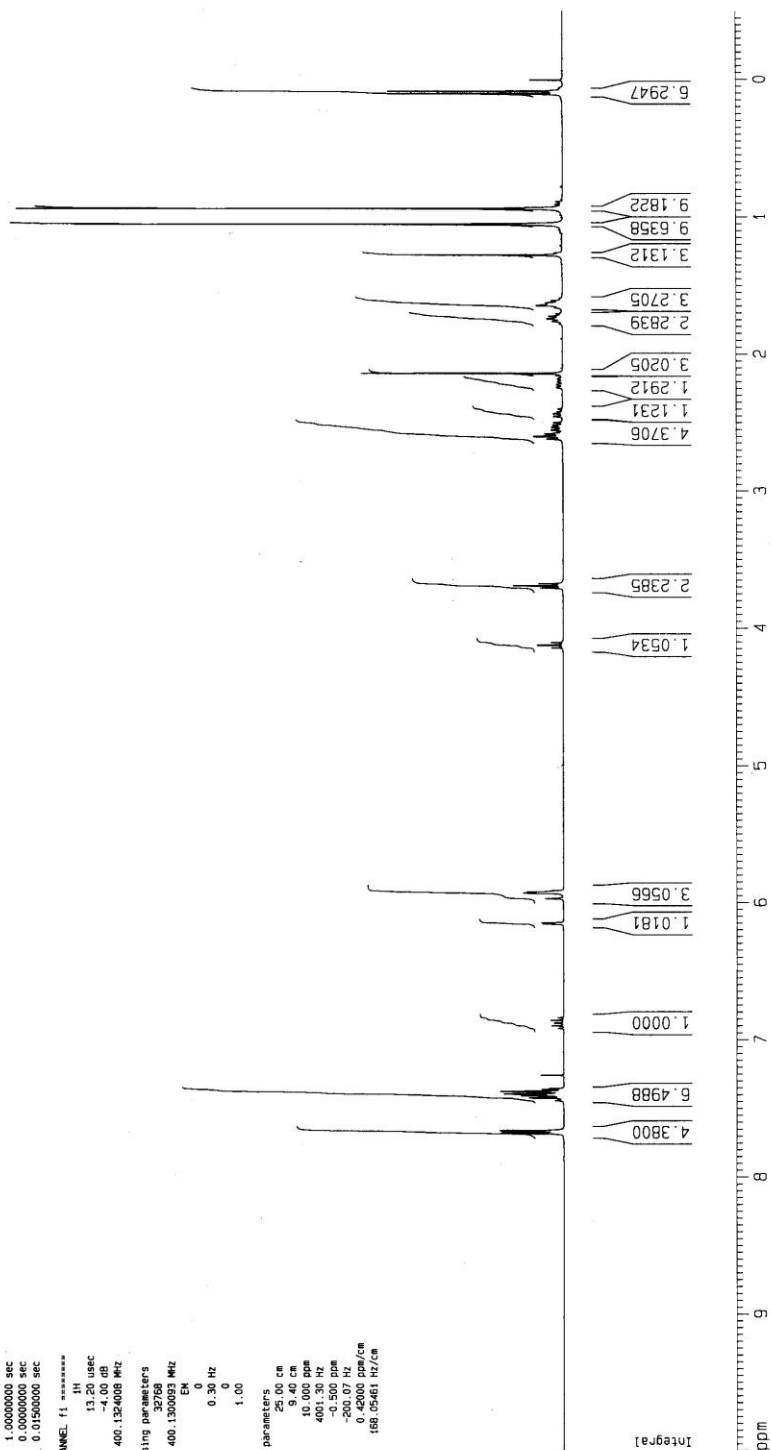

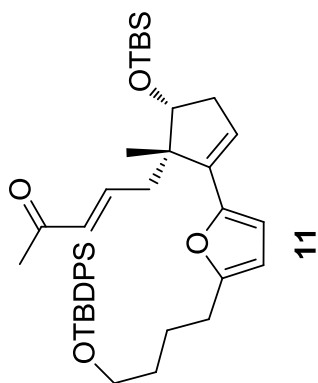

Current Data Parameters  
NAME: LUG2317  
EXPNO: 2  
PROCNO: 1

F2 - Acquisition Parameters  
Date\_: 20100405  
Time: 17.13  
INSTRUM: spect  
PROBHD: 5 mm QNP 1H/13  
PULPROG: zgpg30  
TD: 32768  
SOLVENT: CDCl3  
NS: 146  
DS: 0  
SWH: 25125.658 Hz  
FIDRES: 0.166773 Hz  
AQ: 0.6521332 sec  
RG: 2296.8  
DM: 19.900 usec  
DE: 6.00 usec  
TE: 297.9 K  
D1: 3.0000000 sec  
d11: 0.0500000 sec  
d12: 0.0000000 sec  
d13: 0.0000000 sec  
d14: 0.0000000 sec  
d15: 0.0150000 sec  
d16: 0.0150000 sec

===== CHANNEL f1 =====  
NUC1: 13C  
P1: 9.80 usec  
PL1: -2.50 dB  
SF01: 100.628354 MHz

===== CHANNEL f2 =====  
CPDPRG2: waltz16  
NUC2: 1H  
PCPD2: 80.00 usec  
PL2: -1.50 dB  
PL12: 8.00 dB  
SF02: 400.132007 MHz

F2 - Processing parameters  
SI: 32768  
SF: 100.6127561 MHz  
WDW: EM  
SSB: 0  
LB: 1.00 Hz  
GB: 0  
PC: 1.40

1D NMR plot parameters  
CX: 25.00 cm  
CY: 25.00 cm  
FID: 220.000 ppm  
F1: 23134.81 Hz  
F2: -10.000 ppm  
F2: -1005.13 Hz  
P1: 9.20000 ppm/cm  
H2O: 925.63735 Hz/cm

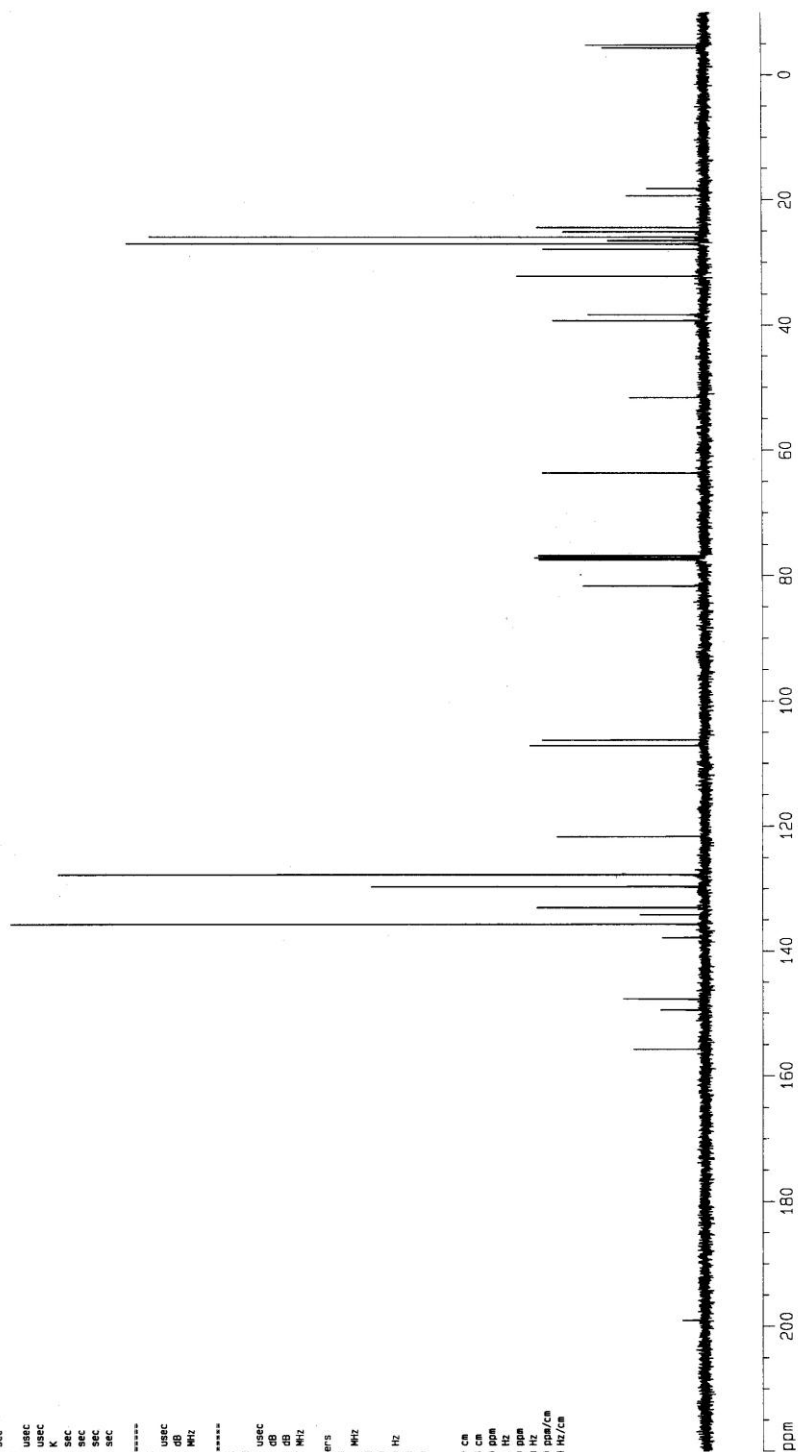

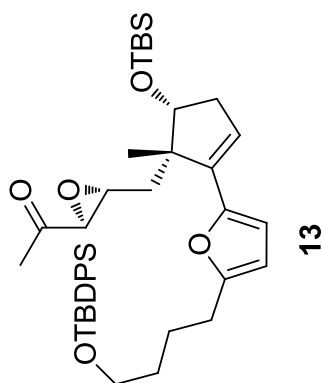

Current Data Parameters  
NAME LLJ026  
EXPNO 1  
PROCNO 1  
F2 - Acquisition Parameters  
Date\_ 20101207  
Time 16.35  
INSTRUM spect  
PROBHD QNP300  
PULPROG zgpg30  
TD 32768  
SOLVENT CDCl3  
NS 400  
DS 4  
SWH 4789.275 Hz  
FIDRES 0.146157 Hz  
AQ 3.4210201 sec  
RG 57  
DM 104.400 usec  
DE 5.00 usec  
TE 300.0 K  
D1 1.00000000 sec  
===== CHANNEL f1 =====  
NUC1 1H  
P1 9.00 usec  
PL1 -5.00 dB  
SFO1 300.1361009 MHz  
F2 - Processing parameters  
SI 32768  
SF 300.1360338 MHz  
WDW EN  
SSB 0  
LB 0.30 Hz  
GB 0  
PC 1.00  
ID NMR plot parameters  
CX 25.00 cm  
FID 10.000 ppa  
F1 3001.30 Hz  
F2 -0.500 ppa  
F3 -150.07 Hz  
PPHCH 0.42000 ppa/cm  
HZCH 125.05462 Hz/cm

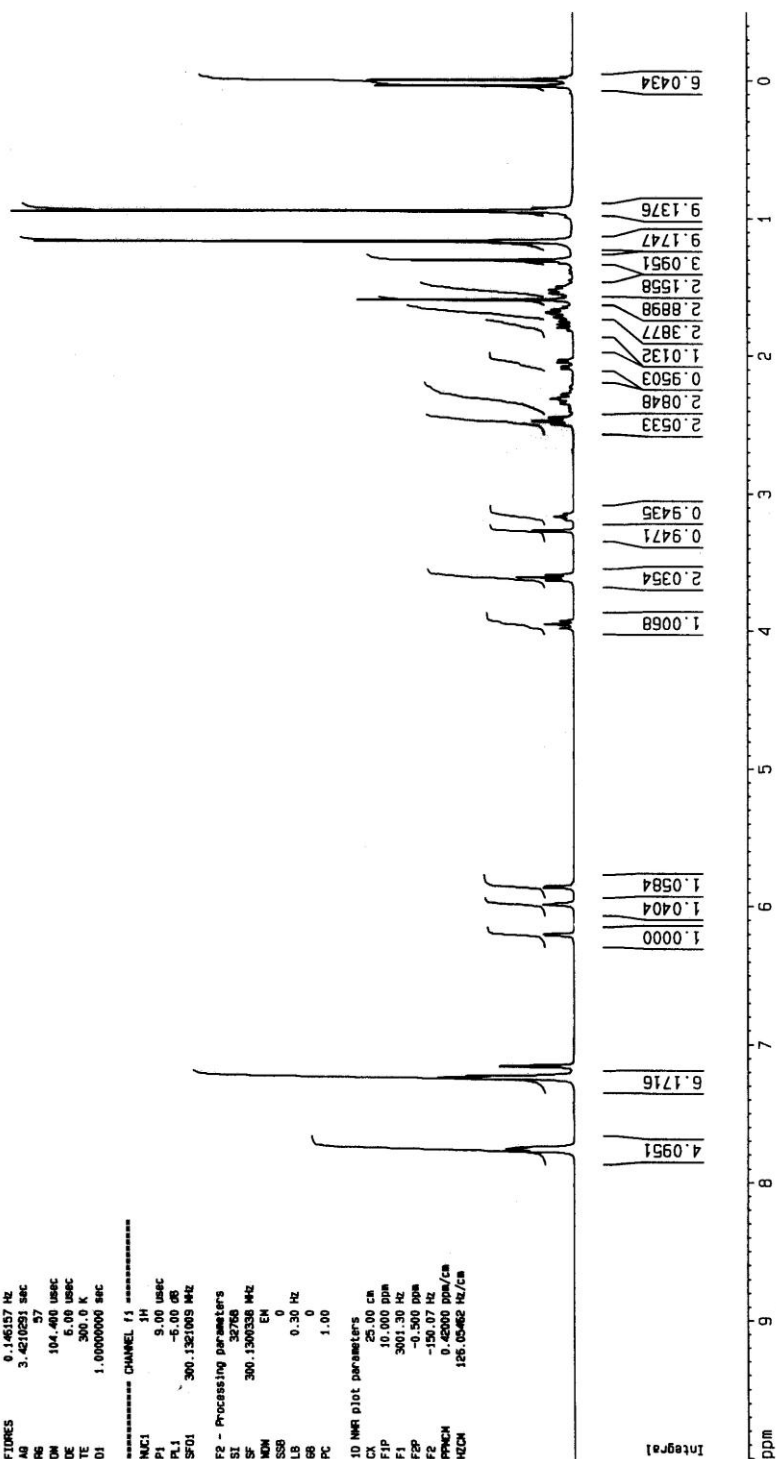

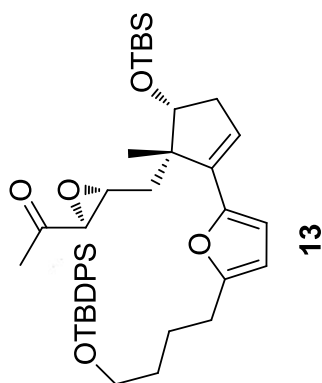

```

Current Data Parameters
NAME      LL1026
EXPNO     2
PROCNO    1

F2 - Acquisition Parameters
Date_     20101207
Time      16.45
INSTRUM   dx300
PROBHD    DUAL 5mm

PULPROG   zgpg
TD         32768
SOLVENT    CDCl3
NS         128
DS         1
SWH        18832.363 Hz
FIDRES     0.574719 Hz
AQ         0.8700404 sec
RG         6192
DM         26.550 usec
DE         6.00 usec
TE         300.0 K
D1         2.50000000 sec
d11        0.03000000 sec

===== CHANNEL f1 =====
NUC1       13C
P1         7.00 usec
PL1        -6.00 dB
SFO1       75.4760204 MHz

===== CHANNEL f2 =====
CPOPRG2    waltz16
NUC2        1H
PCPD2       100.00 usec
PL2         120.00 dB
PL12        18.00 dB
SFO2       300.1312005 MHz

F2 - Processing parameters
SI         32768
SF         75.4677296 MHz
NM         EM
SSB        0
LB         1.00 Hz
GB         0
PC         1.40

1D NMR plot parameters
CX         20.00 cm
F1P        220.000 ppm
F1         16602.90 Hz
F2P        -10.000 ppm
F2         -754.68 Hz
PPHCH      11.50000 ppm/cm
HZCH       867.87885 Hz/cm
  
```

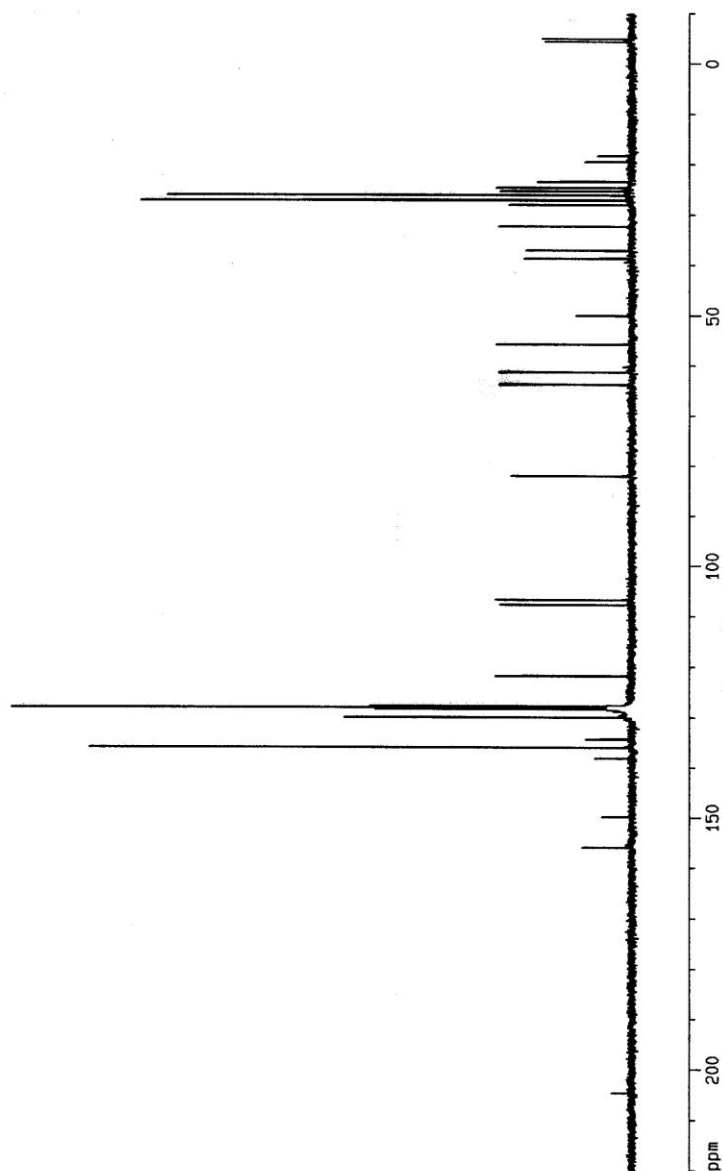

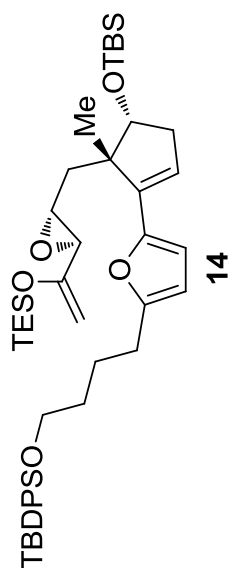

Current Data Parameters  
NAME: 11027  
EXPNO: 1  
PROCNO: 1  
F2 - Acquisition Parameters  
Date\_: 20101209  
Time: 14.11  
INSTRUM: spect  
PROBHD: 5 mm QNP 1H/13  
PULPROG: zgpg30  
TD: 32768  
SOLVENT: DMSO  
NS: 512  
DS: 4  
SWH: 7163.500 Hz  
FIDRES: 0.214226 Hz  
AQ: 2.2807028 sec  
RG: 50.8  
DM: 69.600 usec  
DE: 6.00 usec  
TE: 295.2 K  
D1: 1.00000000 sec  
d11: 0.00000000 sec  
d12: 0.00000000 sec  
d13: 0.00000000 sec  
d14: 0.01500000 sec  
===== CHANNEL f1 =====  
NUC1: 1H  
P1: 13.20 usec  
PL1: 0.00 dB  
SFO1: 400.1324000 MHz  
F2 - Processing parameters  
SI: 32768  
SF: 400.1300443 MHz  
WDW: EM  
SSB: 0  
LB: 0.30 Hz  
GB: 0  
PC: 1.00  
ID: NMR plot parameters  
CY: 256.00 cm  
CX: 10.25 cm  
CY: 10.000 ppm  
F1P: 4001.30 Hz  
F2P: -0.500 ppm  
F2: -200.07 Hz  
PQCH: 0.42500 ppm/cm  
HLCN: 188.05461 Hz/cm

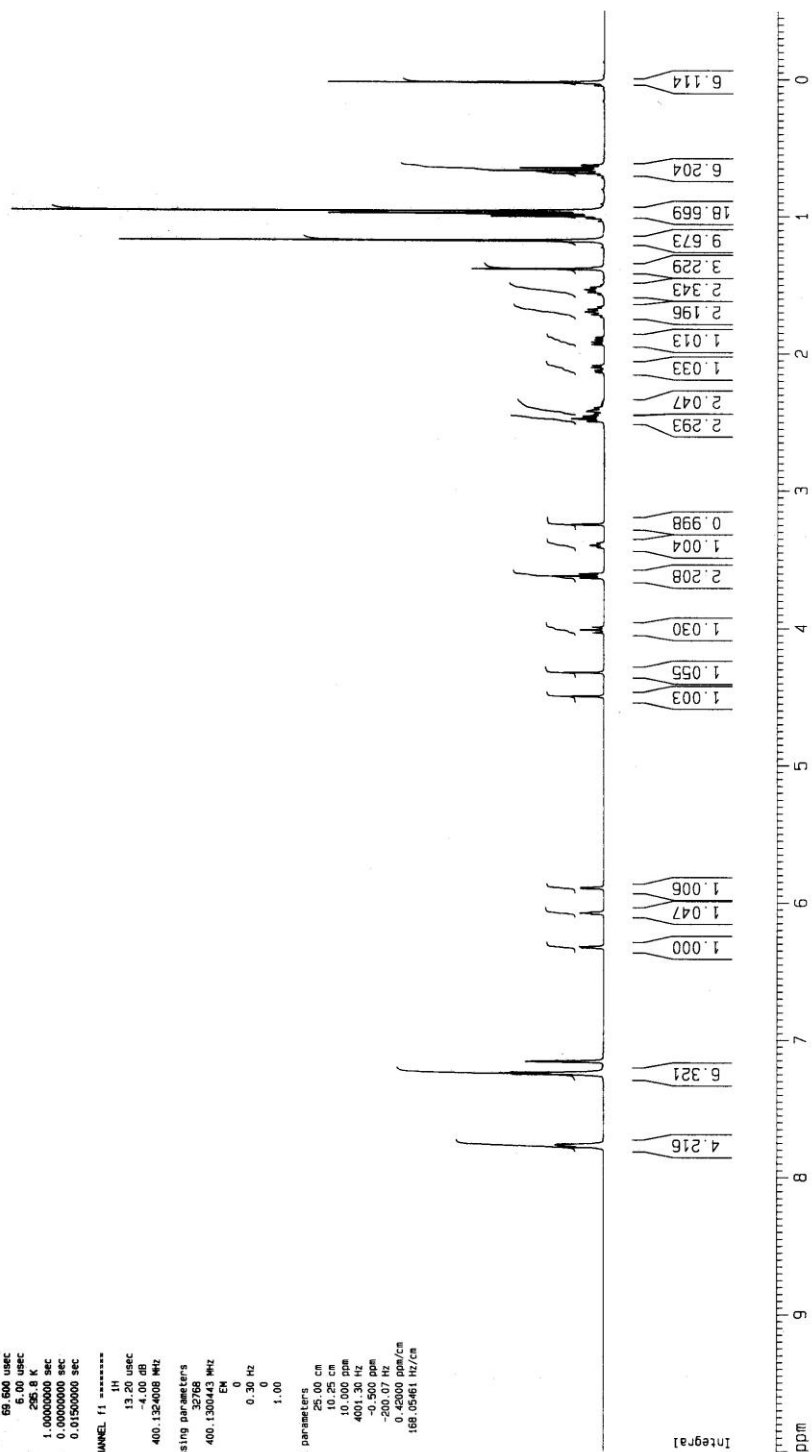



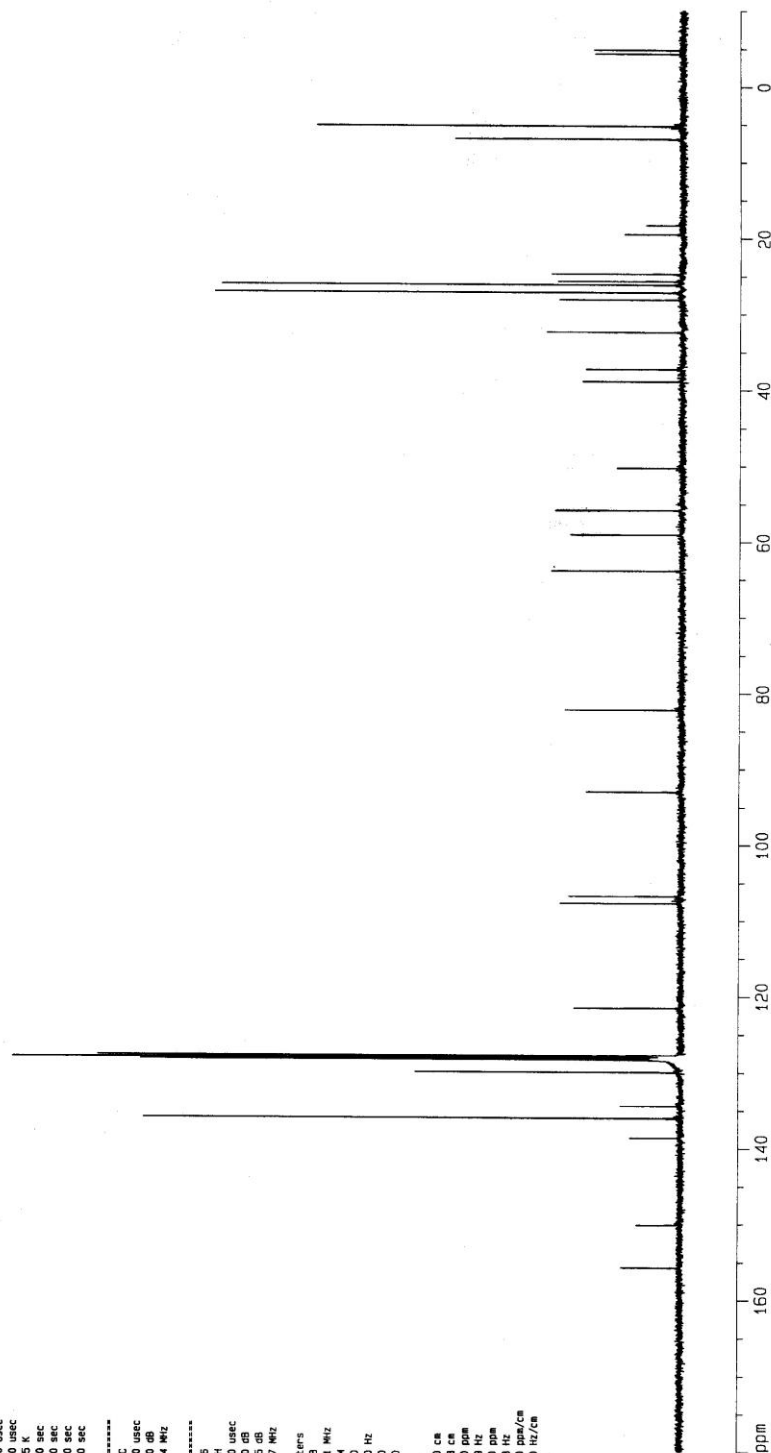

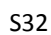

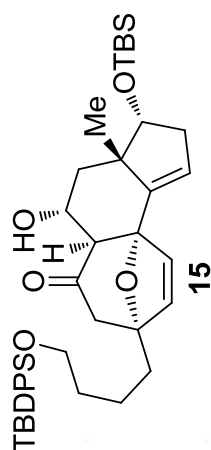

Current Data Parameters  
NAME L1832  
EXPNO 3  
PROCNO 1  
F2 - Acquisition Parameters  
Date\_ 20100510  
Time 16:16  
INSTRUM spect  
PROBHD BBO Sm 231d/1  
PULPROG zgpg30  
TD 32768  
SOLVENT CDCl3  
DS 1  
OS 1  
SH 31446.541 Hz  
FIDRES 0.5200000 Hz  
AQ 0.5200000 Hz  
RG 7298.2  
RW 15.900 Hz  
OR 15.900 Hz  
TE 298.15 K  
D1 3.0000000 sec  
D11 11.0000000 sec  
D2 0.5000000 sec  
D21 0.5000000 sec  
D3 0.0150000 sec  
D31 0.0150000 sec  
===== CHANNEL f1 =====  
NUC1 13C  
P1 11.00 usec  
PL 0.00 dB  
PC 1.00  
SFO1 125.761254 MHz  
===== CHANNEL f2 =====  
CPDPRG2 waltz16  
NUC2 1H  
P2 100.00 usec  
PL2 0.00 dB  
PL12 14.00 dB  
PL13 14.00 dB  
SFO2 500.1310000 MHz  
F2 - Processing parameters  
SI 32768  
SF 125.757720 MHz  
WDW EM  
SSB 0  
LB 1.20 Hz  
GB 0  
PC 1.00  
LO WALTZ parameters  
CY 25.00 Hz  
CY 12.20 Hz  
F1 200.1310000 MHz  
F2 -10.000 Hz  
F3 -125.758 Hz  
F4 125.757720 MHz  
H2CN 125.757720 MHz

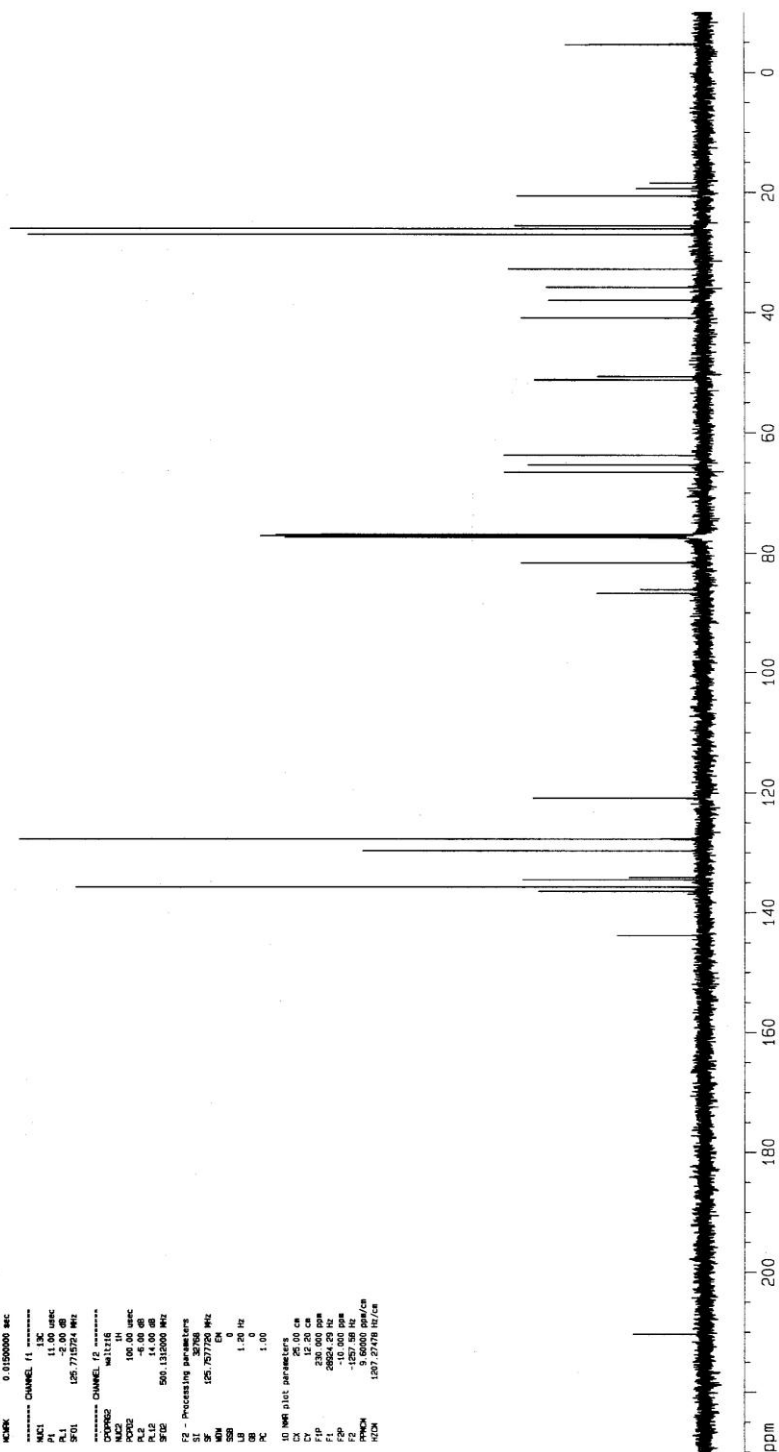

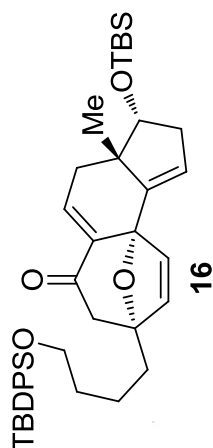

Current Data Parameters  
EXPNO 1  
PROCNO 1  
F2 - Acquisition Parameters  
Date\_ 20100519  
Time 14.54  
INSTRUM spect  
PROBHD 5 mm QNP 1H/13  
PULPROG zgpg30  
TD 32768  
SOLVENT CDCl3  
NS 12  
DS 4  
SWH 7183.908 Hz  
FIDRES 0.218235 Hz  
AQ 2.2807028 sec  
RG 161.3  
DM 69.600 uM  
DE 6.00 uM  
TE 300.2 K  
D1 1.0000000 sec  
d11 0.0000000 sec  
d12 0.0000000 sec  
d13 0.0150000 sec  
d14 0.0150000 sec  
===== CHANNEL f1 =====  
NUC1 1H  
P1 13.00 uM  
PL1 -4.00 dB  
SFO1 400.1324008 MHz  
F2 - Processing parameters  
SI 32768  
SF 400.1300443 MHz  
WDW EM  
SSB 0  
LB 0.30 Hz  
GB 0  
PC 1.00  
===== CHANNEL f2 =====  
NUC2 13C  
P2 12.50 uM  
PL2 -4.00 dB  
SFO2 100.6261250 MHz  
F2 - Processing parameters  
SI 32768  
SF 100.6261250 MHz  
WDW EM  
SSB 0  
LB 0.30 Hz  
GB 0  
PC 1.00  
===== CHANNEL f3 =====  
NUC3 13C  
P3 12.50 uM  
PL3 -4.00 dB  
SFO3 100.6261250 MHz  
F3 - Processing parameters  
SI 32768  
SF 100.6261250 MHz  
WDW EM  
SSB 0  
LB 0.30 Hz  
GB 0  
PC 1.00

Integral

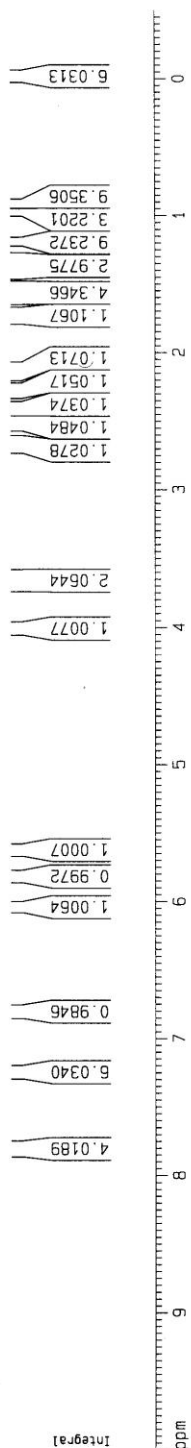

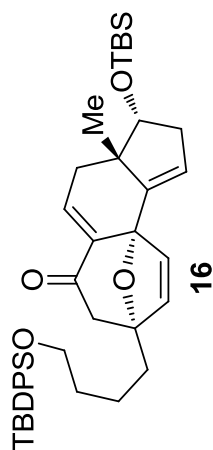

Current Data Parameters  
Name: 16  
EXPNO: 2  
PROCNO: 1

F2 - Acquisition Parameters  
Date\_: 20100519  
Time: 15.02  
INSTRUM: spect  
PROBHD: 5 mm QNP 1H/13  
PULPROG: zgpg30  
TO: 32768  
SOLVENT: CDCl3  
NS: 276  
DS: 0  
SWH: 25125.620 Hz  
FIDRES: 0.166771 Hz  
AQ: 0.652132 sec  
RG: 2298.8  
DM: 19.800 usec  
DE: 6.00 usec  
TE: 298.2 K  
T1: 3.0000000 sec  
T1RHO: 0.0000000 sec  
T2: 0.0000000 sec  
T2RHO: 0.0000000 sec  
MORPH: 0.0150000 sec  
MORPH: 0.0150000 sec

===== CHANNEL f1 =====  
NUC1: 13C  
P1: 6.00 usec  
PL1: 0.00 dB  
SFO1: 100.628354 MHz

===== CHANNEL f2 =====  
CPDPRG2: waltz16  
NUC2: 1H  
P2: 80.00 usec  
PL2: 0.00 dB  
PL12: 8.00 dB  
SFO2: 400.132007 MHz

F2 - Processing parameters  
SI: 32768  
SF: 100.6127424 MHz  
WDW: EM  
SSB: 0  
LB: 1.00 Hz  
GB: 0  
PC: 1.40

1D NMR plot parameters  
X: 250.00  
Y: 250.00  
F1: 220.000 ppm  
F2: 22134.80 Hz  
F2P: -10.000 ppm  
F2: -1005.13 Hz  
PCHN: 9.20000 ppm/cm  
HZCM: 925.6371 Hz/cm

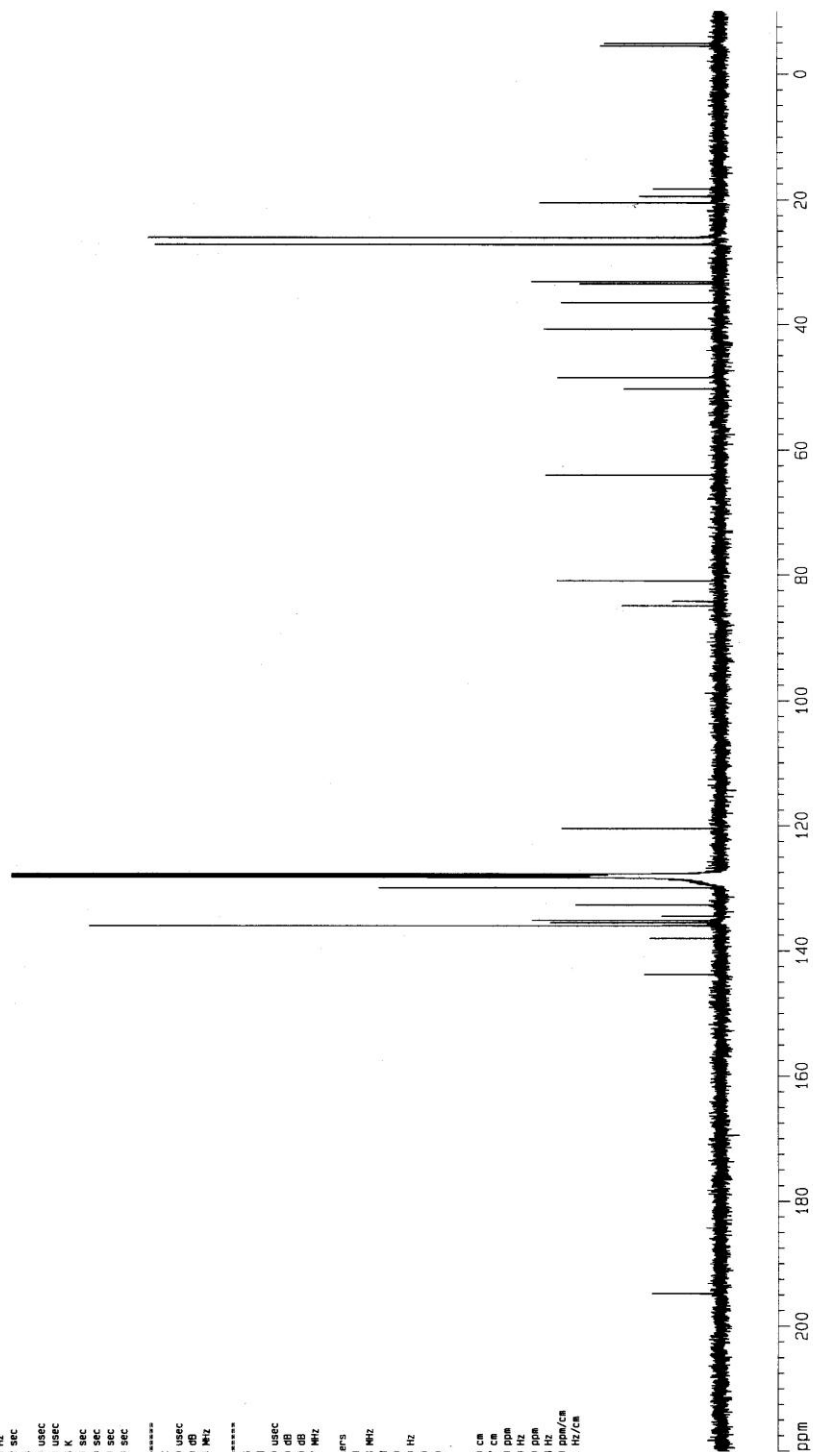

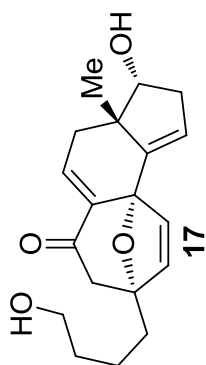

Current Data Parameters  
EXPNO 1  
PROCNO 1  
F2 - Acquisition Parameters  
Date\_ 20100524  
Time 17:16:50  
INSTRUM spect  
PROBHD 5 mm QNP 1H/13  
PULPROG zgpg30  
TD 32768  
SOLVENT CDCl3  
NS 20  
DS 4  
SWH 7183.908 Hz  
FIDRES 0.218235 Hz  
AQ 2.2867028 sec  
RG 456.1  
DM 69.600 uSec  
DE 6.00 uSec  
TE 300.2 K  
D1 1.00000000 sec  
MCHRG 0.00000000 sec  
MCHRG 0.01500000 sec  
===== CHANNEL f1 =====  
NUC1 1H  
P1 13.00 uSec  
PL1 -4.00 dB  
SFO1 400.1324008 MHz  
F2 - Processing parameters  
SI 32768  
SF 400.1350443 MHz  
WDW EM  
SSB 0  
LB 0.30 Hz  
GB 0  
PC 1.00  
D0 NMR file parameters  
CY 25.00 cm  
C4 40.17 cm  
F1P 10.000 ppm  
F1 4001.30 Hz  
F2P -0.500 ppm  
F2 -200.07 Hz  
NUC2 13C  
P2 12.00 uSec  
PL2 0.00 dB  
SFO2 100.6261197 MHz

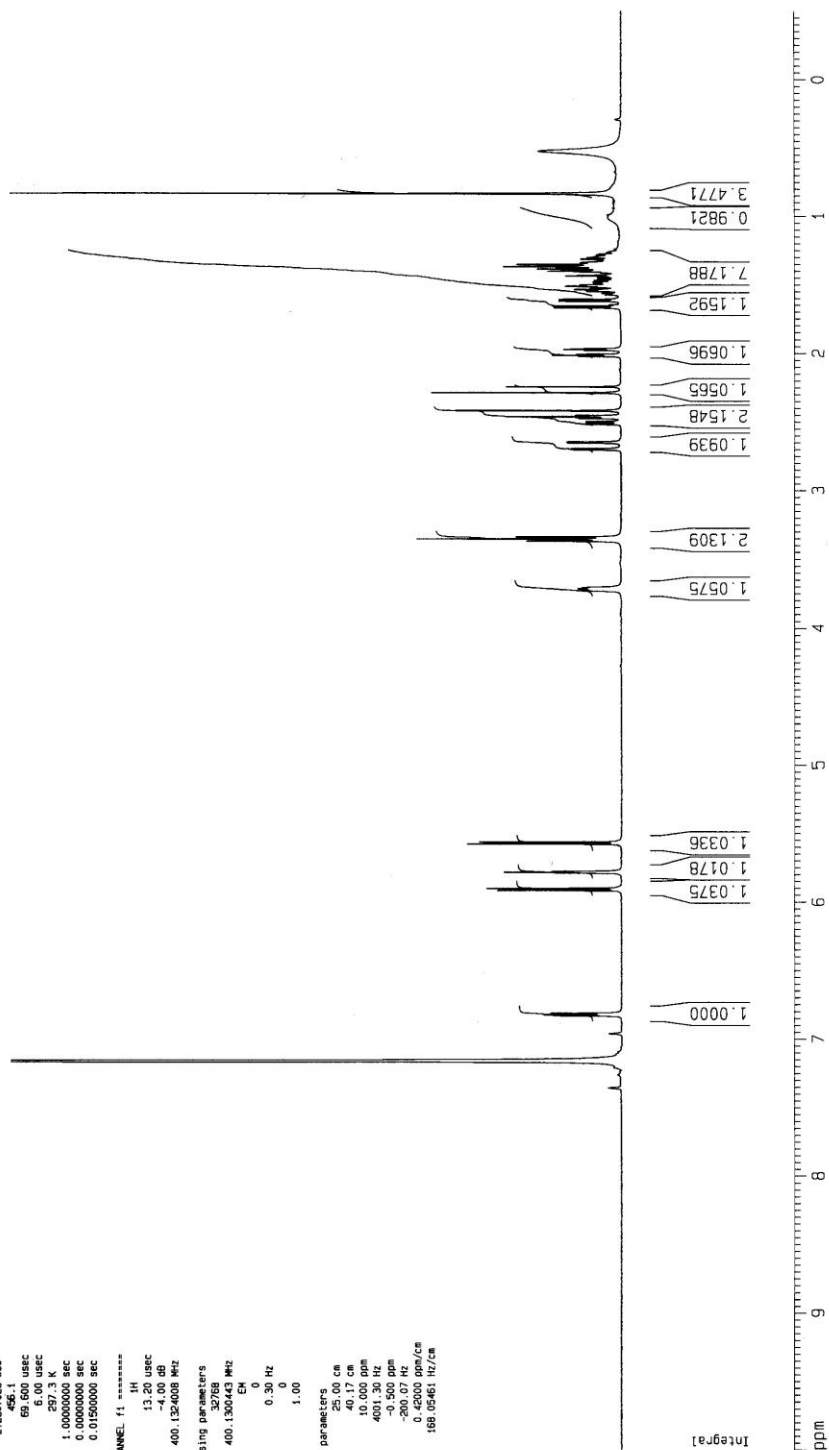

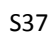

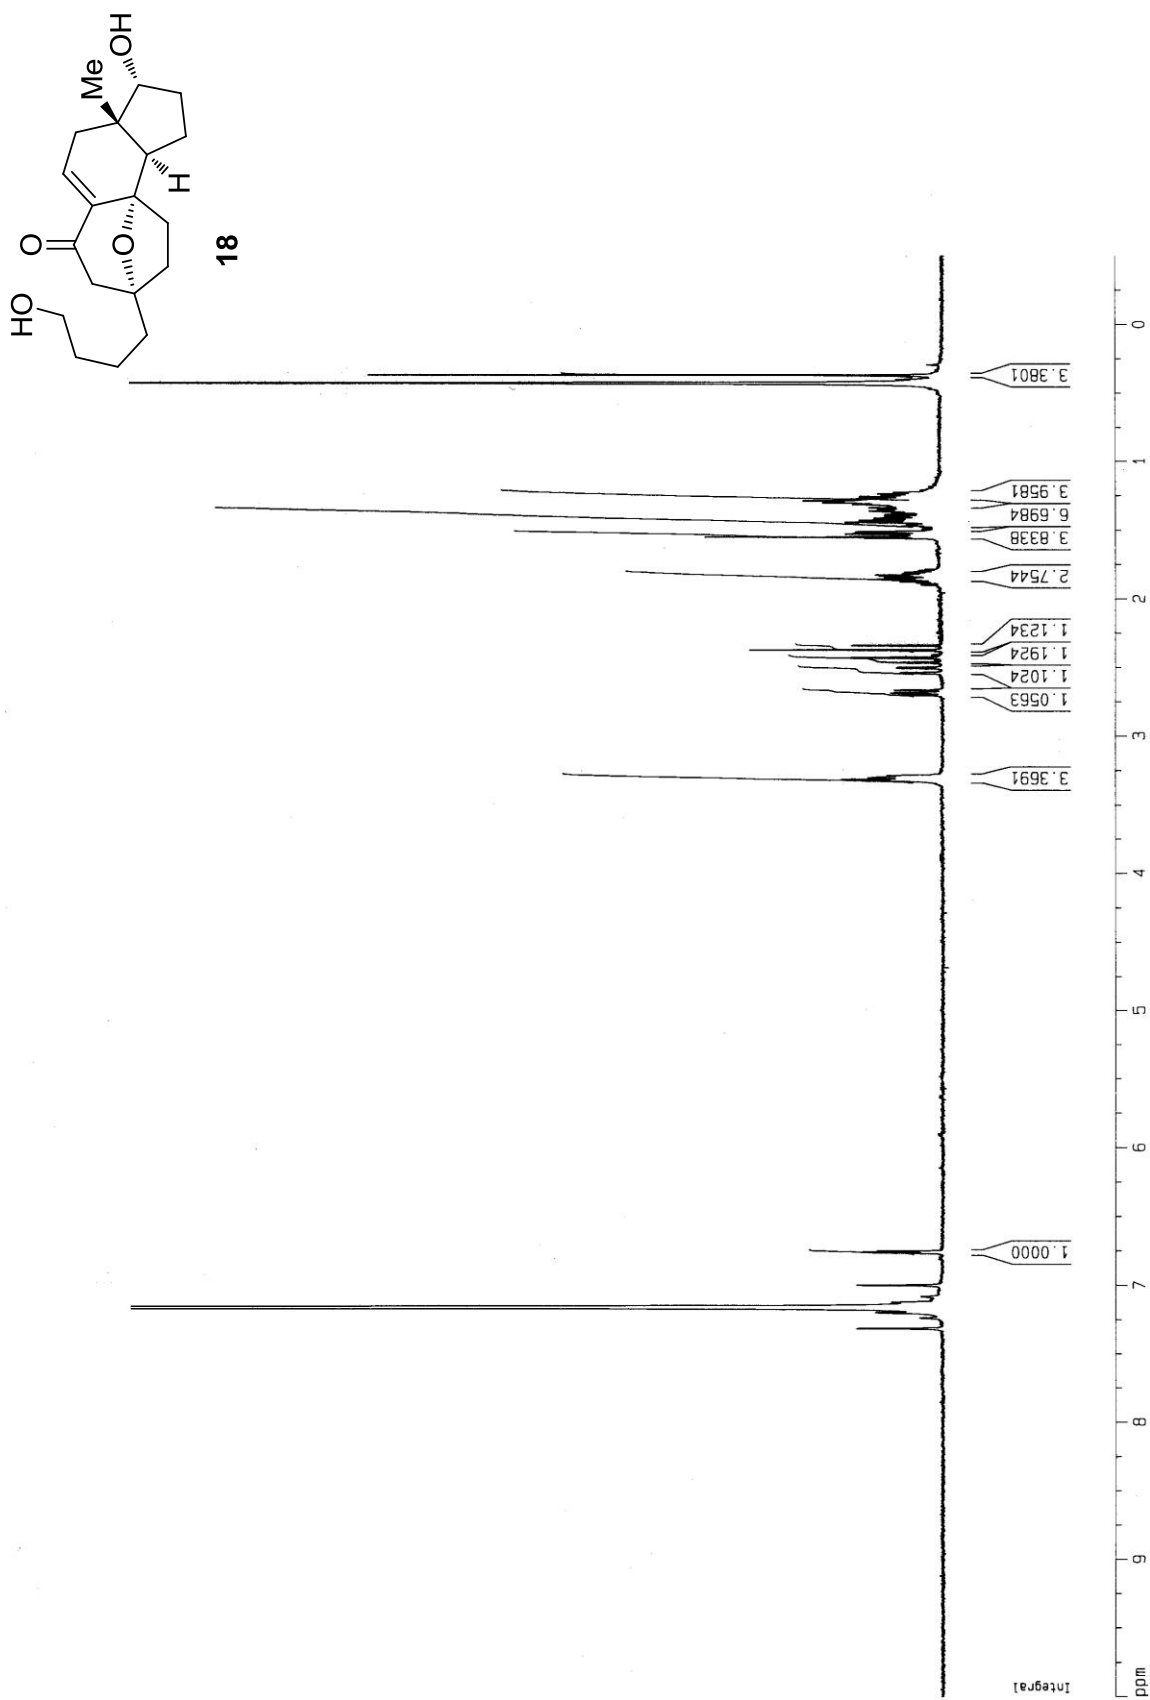



18

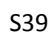

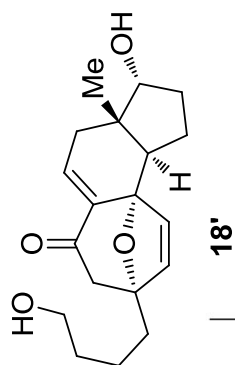

Current Data Parameters  
NAME 18-27-14-15  
EXPNO 1  
PROCNO 1  
F2 - Acquisition Parameters  
Date\_ 20100930  
Time 17:44  
INSTRUM spect  
PROBHD 5mm Z146/  
PULPROG zgpg30  
SOLVENT DMSO  
SOLVENT DMSO  
NS 16  
DS 4  
SWH 7465.030 Hz  
FIDRES 0.228425 Hz  
AQ 2.1889924 sec  
RG 327.500  
IN 66.800 usec  
DE 6.00 usec  
TE 300.1 K  
TD 65536  
SFO 500.136037 MHz  
KRGST 0.0000000 sec  
MCURK 0.0150000 sec  
\*\*\*\*\* CHANNEL f1 \*\*\*\*\*  
NUC1 1H  
P1 11.60 usec  
PL1 -5.00 dB  
SFO1 500.136037 MHz  
F2 - Processing parameters  
SI 32768  
SF 500.136037 MHz  
WDW EN  
SSB 0  
GB 0  
PC 1.00  
DO 4096 points  
CX 25.00 cm  
CY 12.64 cm  
F1 10.135300 MHz  
F2 -0.500000 ppm  
F2 250.07 Hz  
PCPN 0.0000000 sec  
PCPN 210.05461 Hz/sec

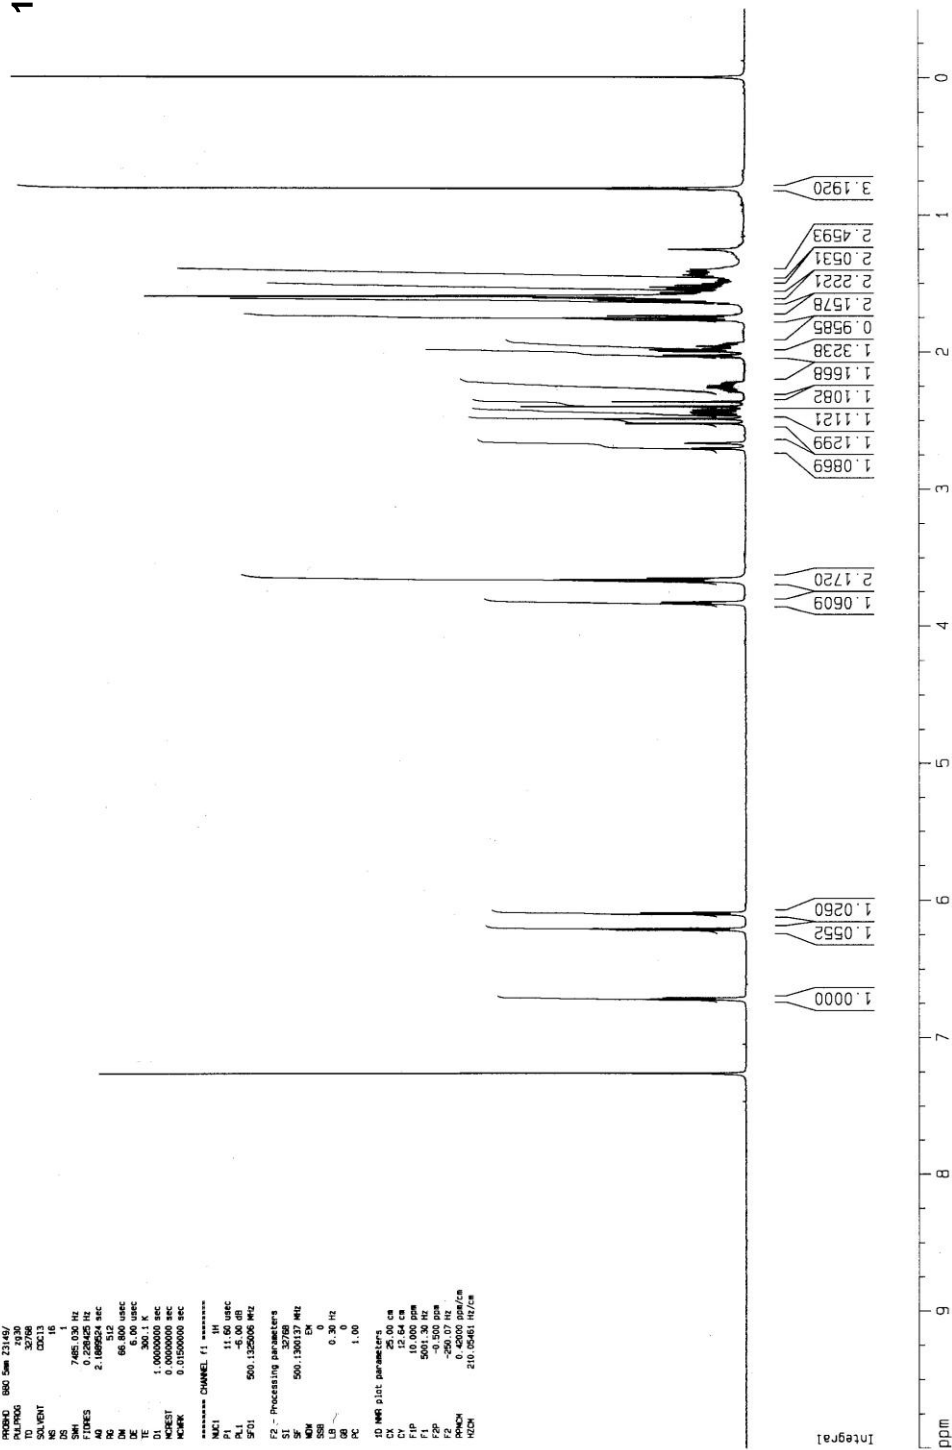

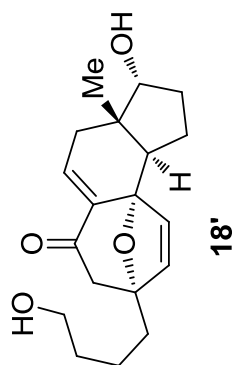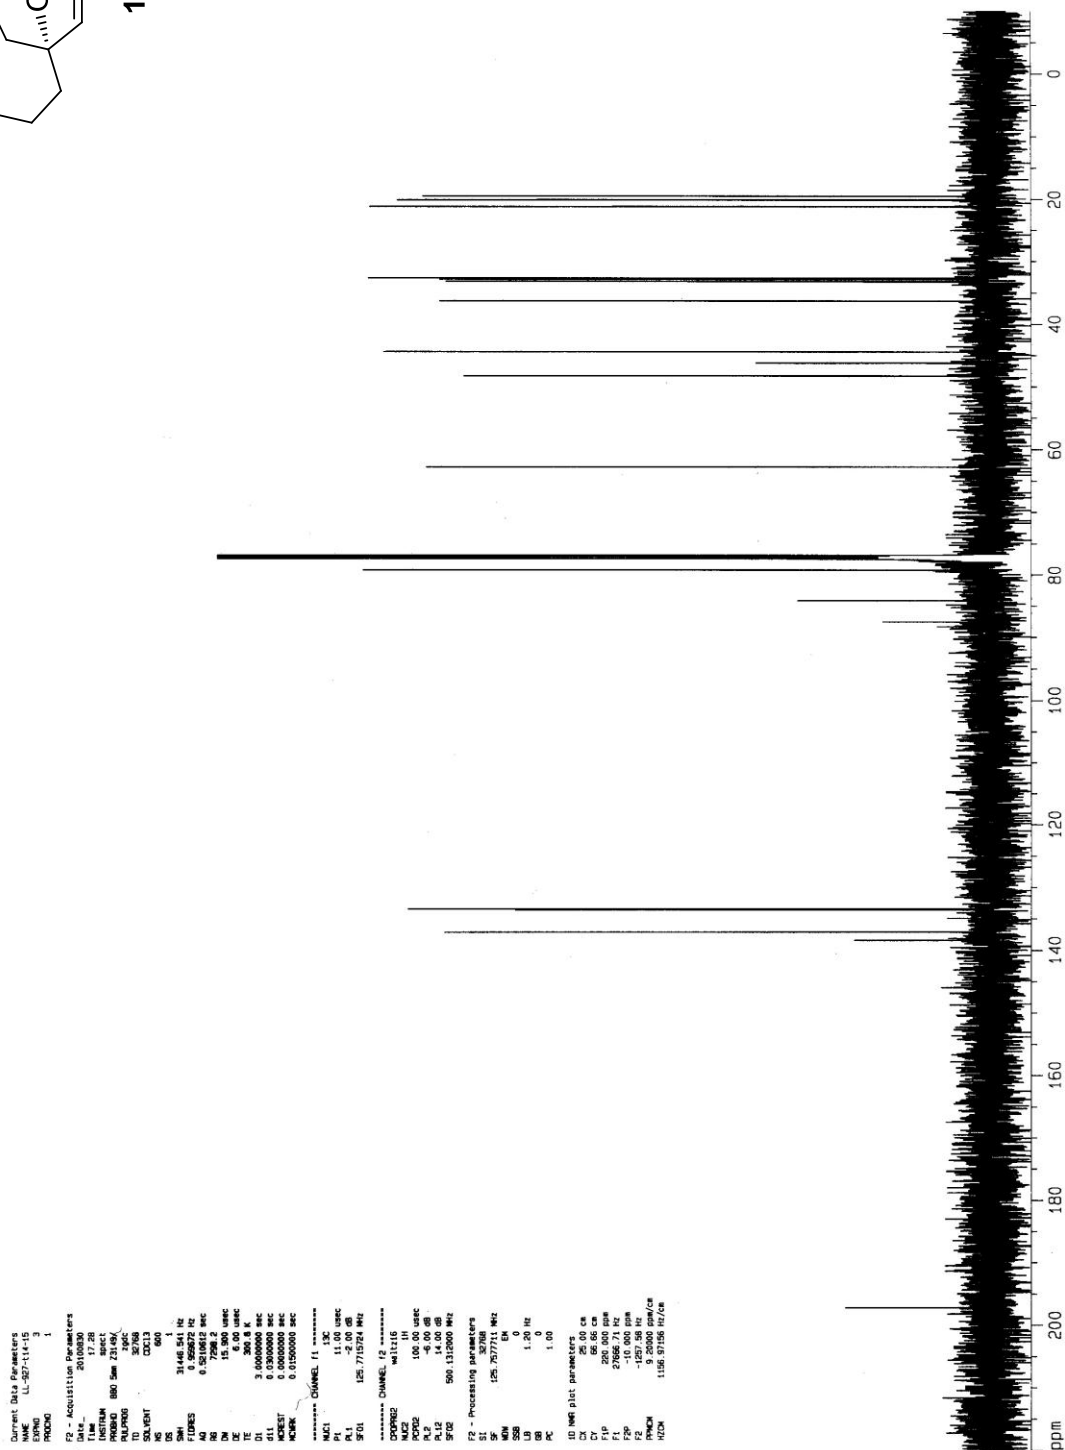

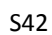

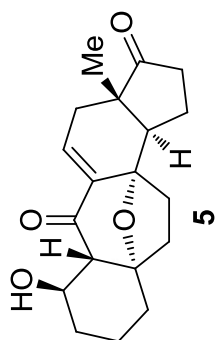

```

Current Data Parameters
NAME          LL-997
EXPNO         3
PROCNO        1
F2 - Acquisition Parameters
Date_         20100505
Time          15.58
INSTRUM       spect
PROBHD        BBO 5mm 23146/
PULPROG       zgpg30
TD             32768
SOLVENT       CDCl3
NS            1511
DS            1
SWH            31446.541 Hz
FIDRES         0.520072 Hz
AQ             0.5200512 sec
RG             9195.2
AQ             15.960 usec
DE            3.00 usec
TE             300.2 K
D1             3.00000000 sec
d11            0.00000000 sec
DELTA          0.00000000 sec
ACQRES        0.01500000 sec
***** CHANNEL f1 *****
NUC1           13C
P1             11.00 usec
PL             0.00 dB
SFO1          125.767576 MHz
***** CHANNEL f2 *****
CPDPRG2       waltz16
NUC2           1H
P2             100.00 usec
PL2            19.00 dB
PL12           14.00 dB
SFO2          500.1310000 MHz
F2 - Processing parameters
SI             32768
SF            125.757568 MHz
WDW            0
SSB            0
LB             1.20 Hz
GB             0
PC             1.00
LS WFT plot parameters
CH            26.00 cm
CY            513.47 cm
F1P           228.000 MHz
F2P           -5.000 MHz
FE            408.70 Hz
WDW            0
SSB            0
LB             1.000 Hz
GB             0
PC            1180.0000 Hz/Hz
  
```

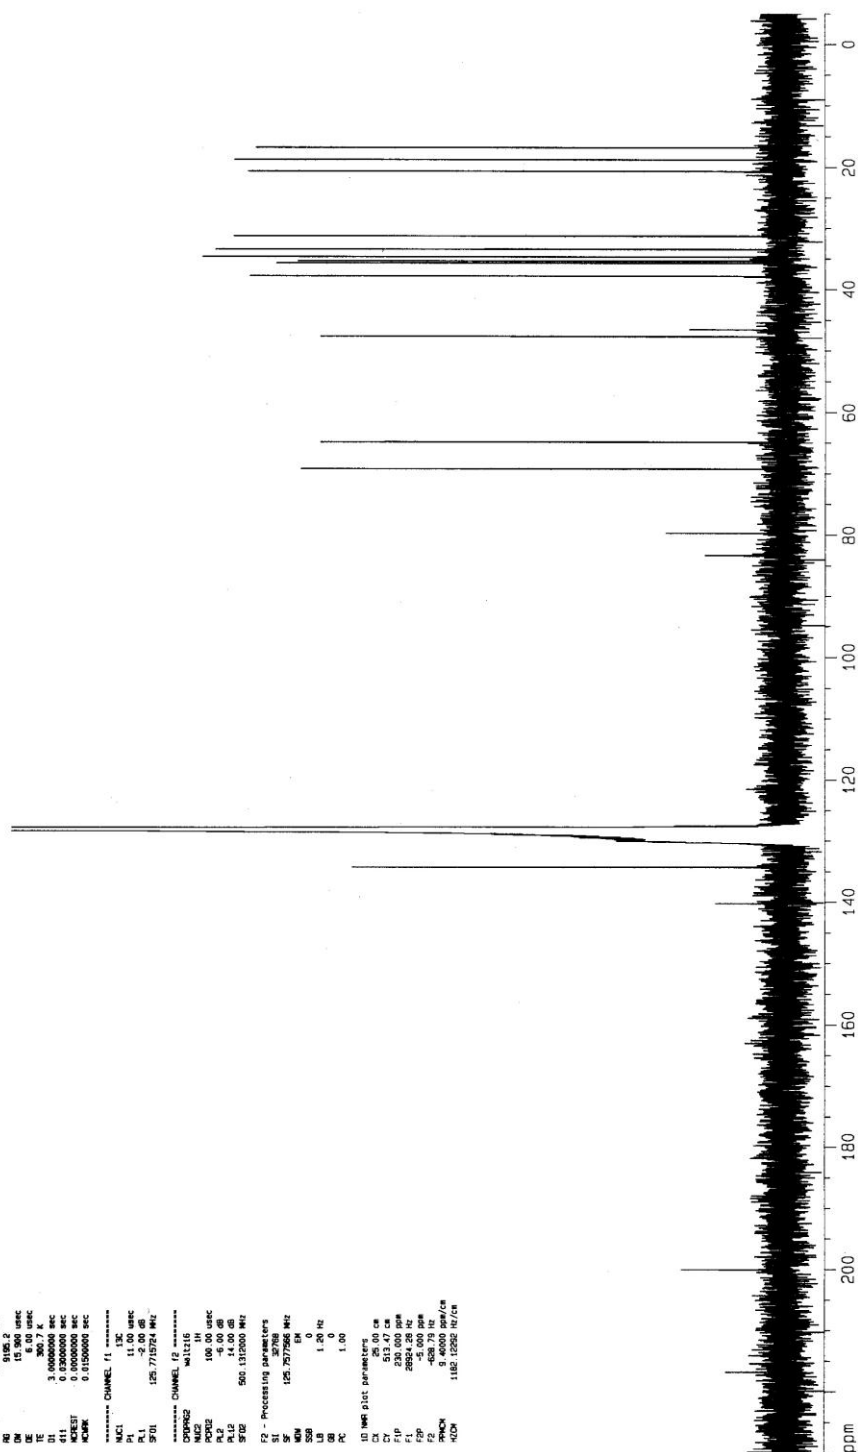

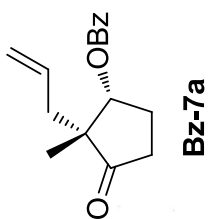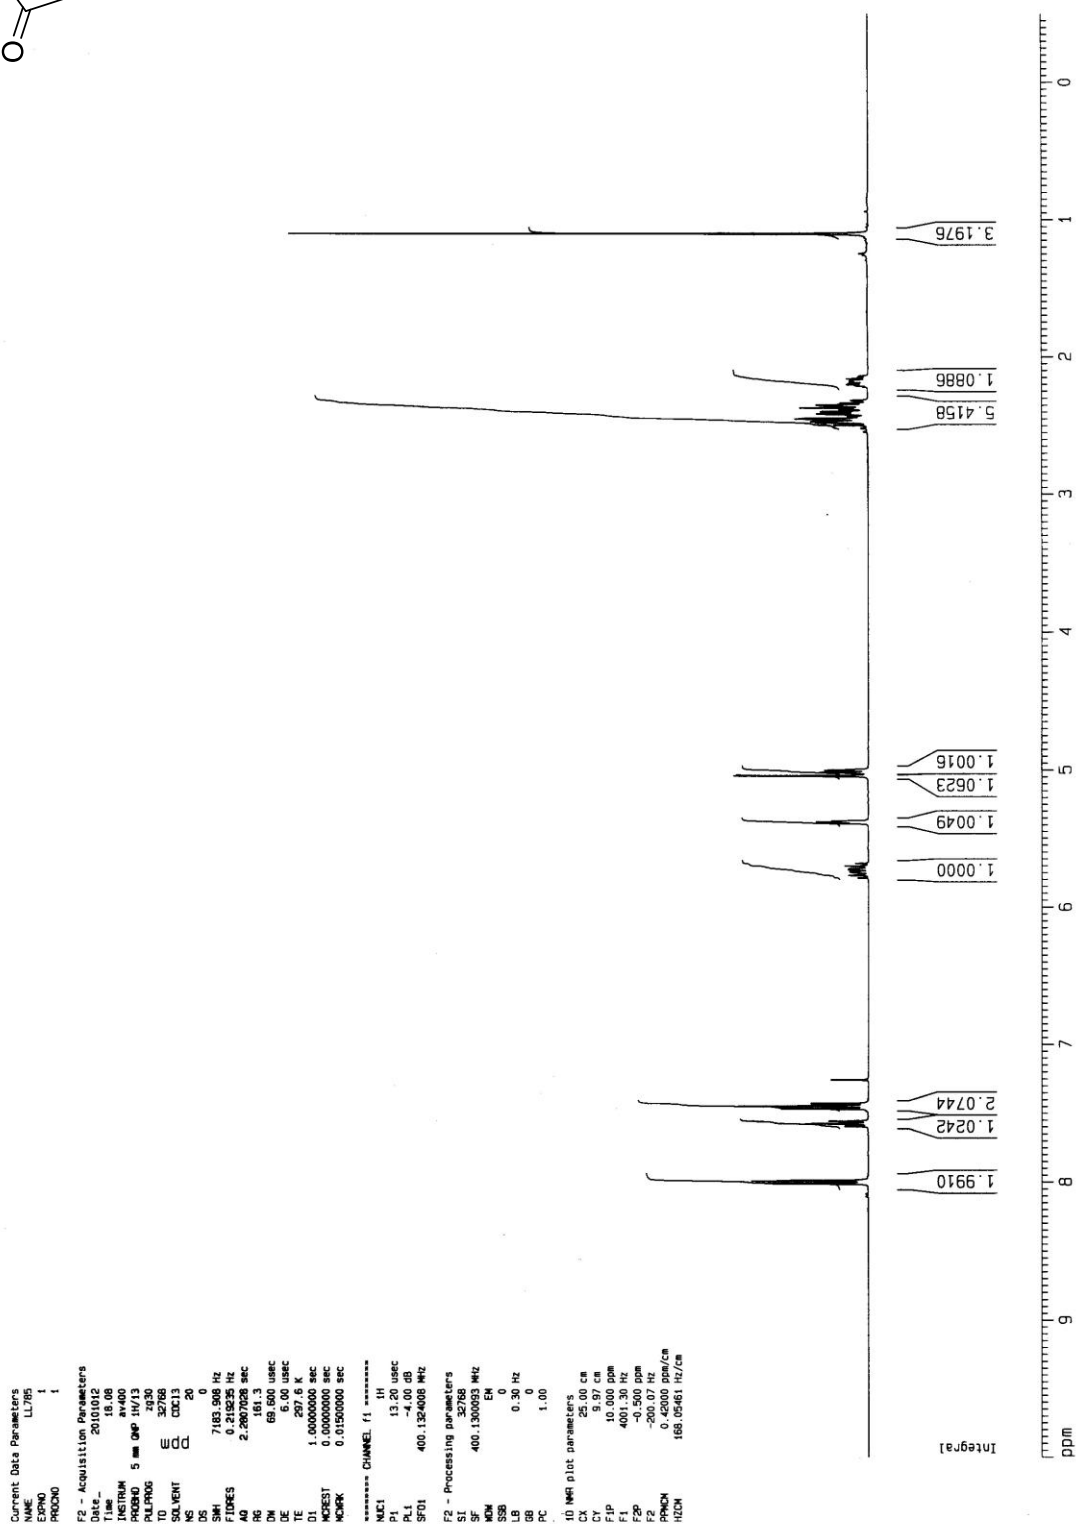

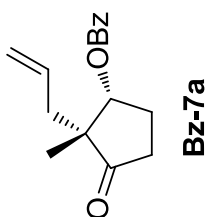

Current Data Parameters  
NAME LL765  
EXPNO 2  
PROCNO 1

F2 - Acquisition Parameters  
Date\_ 20101012  
Time 18.14  
NORM 18.14  
PROBHD 5 mm QNP 1H/13  
PULPROG zgpg30  
TD 32768  
SOLVENT CDCl3  
NS 108  
DS 0  
SWH 25125.629 Hz  
FIDRES 0.000132 Hz  
AQ 0.052132 sec  
RG 4096  
DM 19.900 usec  
DE 6.00 usec  
TE 298.3 K  
D1 3.00000000 sec  
DELTA 0.03000000 sec  
WALTZ16 0.01500000 sec  
WALTZ16 0.01500000 sec

===== CHANNEL f1 =====  
NUC1 13C  
P1 10.00 usec  
PL1 -5.00 dB  
SFO1 100.6253504 MHz

===== CHANNEL f2 =====  
CPDPRG2 waltz16  
NUC2 1H  
P2 80.00 usec  
PL2 -4.00 dB  
SFO2 400.1320007 MHz

F2 - Processing parameters  
SI 32768  
SF 100.6127568 MHz  
WDW EN  
SSB 0  
GB 1.00 Hz  
PC 1.40

10 MHz plot parameters  
CX 25.00 cm  
CY 11.93 cm  
FID 240.00 Hz  
F1 24147.06 Hz  
F2 0.000 Hz  
PPHCH 9.60000 ppm/cm  
HZCH 965.98257 Hz/cm

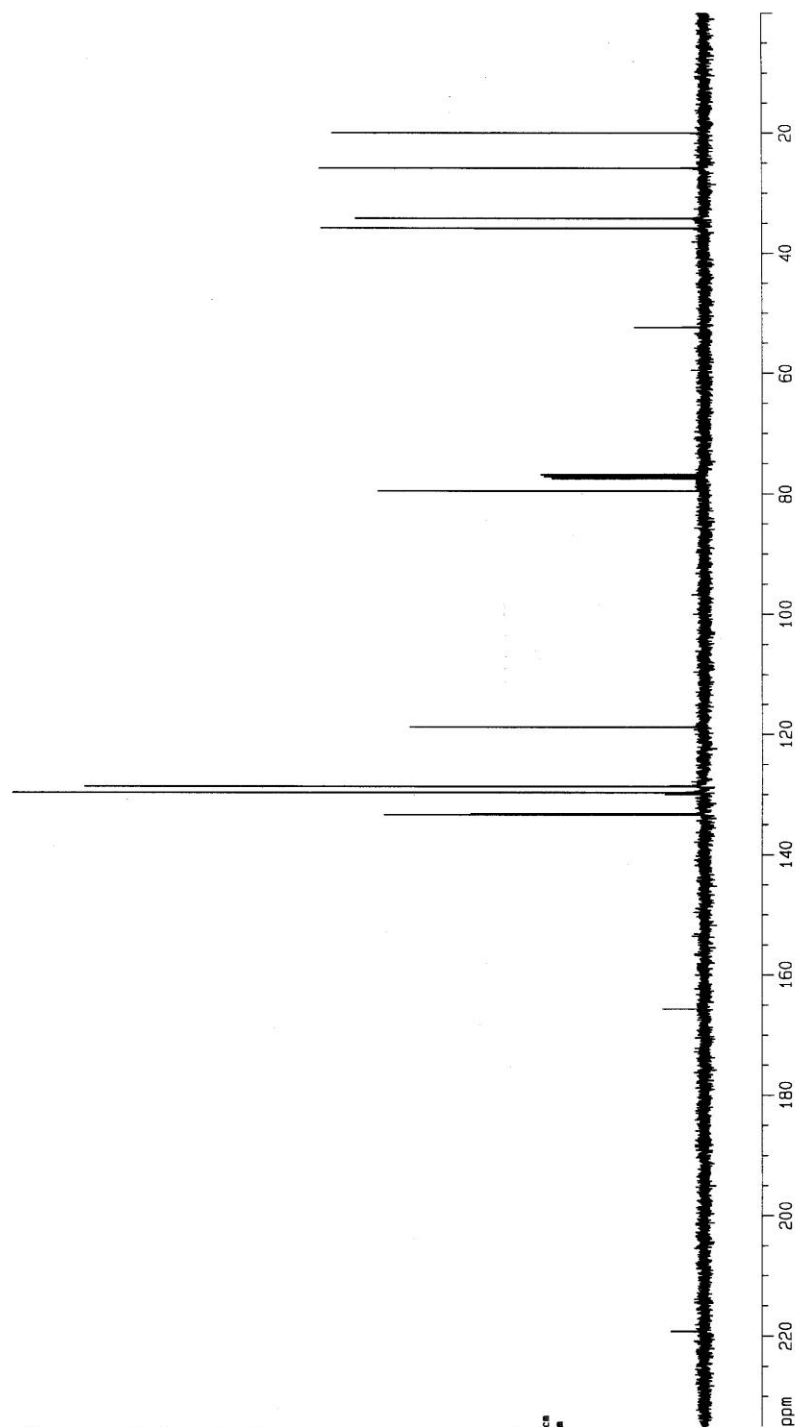

Supplement: c1cc00087j_b.pdf [file c1cc00087j_b.pdf]
